# Supplementary material for: Serum anti‑KIAA0513 antibody as a common biomarker for mortal atherosclerotic and cancerous diseases
Source: Med Int (Lond). 2024 Jun 19;4(5):45. doi: 10.3892/mi.2024.169 (PMC11228693; doi:10.3892/mi.2024.169)
Supplement: ProtoArray® screening for autoantibodies in atherosclerosis. [file Supplementary_Data2.xlsx]

## Sheet: Results of protein  array
Table SI. ProtoArray® screening for autoantibodies in atherosclerosis.
Database ID	Ultimate ORF ID	Description	Total positive No./10 normal control sera	Total positive No./10 patients' sera
BC030280.1	IOH21522	KIAA0513 (KIAA0513)	1	6
NM_001892.4	IOH59150	casein kinase 1, alpha 1 (CSNK1A1), transcript variant 2	0	2
BC001396.1	IOH3939	chromosome 9 open reading frame 32 (C9orf32)	0	3
NM_007131.2	IOH44207	zinc finger protein 75 (D8C6) (ZNF75)	0	2
NM_005240.1	IOH13301	ets variant gene 3 (ETV3)	0	2
NM_031435.1	IOH6992	THAP domain containing, apoptosis associated protein 2 (THAP2)	0	1
BC050428.1	IOH26675	katanin p60 (ATPase-containing) subunit A 1 (KATNA1)	0	1
NM_152615.1	IOH35770	poly (ADP-ribose) polymerase family, member 15 (PARP15)	0	1
BC047303.1	IOH26558	chromosome 6 open reading frame 134 (C6orf134)	0	2
NM_032153.3	IOH42240	Zinc finger protein ZIC 4	0	0
NM_018983.2	IOH3041	nucleolar protein family A, member 1 (H/ACA small nucleolar RNPs) (NOLA1), transcript variant 1	0	4
BC001697.1	IOH3864	ribosomal protein S15a (RPS15A)	0	2
BC034435.1	IOH21500	zinc finger CCCH-type containing 3 (ZC3H3)	0	4
NM_023931.1	IOH3950	zinc finger protein 747 (ZNF747)	0	3
BC030290.1	IOH21571	RNA-binding motif, single-stranded-interacting protein 3	0	2
NM_016304.2	IOH7552	chromosome 15 open reading frame 15 (C15orf15)	0	3
NM_003939.2	IOH42069	beta-transducin repeat containing (BTRC), transcript variant 2, mRNA.	0	2
NM_173579.1	IOH42346	proline rich 10 (PRR10)	0	2
BC020729.1	IOH12978	cyclin E2 (CCNE2)	0	3
BC014837.1	IOH11818	60S ribosomal protein L15	0	2
NM_001024646.1	IOH58964	CDC-like kinase 1 (CLK1), transcript variant 2	0	1
BC032518.1	IOH21930	cyclin G2 (CCNG2)	0	1
BC022288.1	IOH12278	calsequestrin 2 (cardiac muscle) (CASQ2)	1	2
NM_001893.3		casein kinase 1, delta (CSNK1D), transcript variant 1	1	1
NM_138412.1	IOH12664	retinol dehydrogenase 13 (all-trans/9-cis) (RDH13)	0	1
BC014271.2	IOH13908	endoglin (Osler-Rendu-Weber syndrome 1) (ENG)	1	5
NM_138730.1	IOH9857	high mobility group nucleosomal binding domain 3 (HMGN3), transcript variant 2	0	3
BC001662.1		MAP kinase-activated protein kinase 3	1	3
NM_015607.2	IOH41553	Uncharacterized protein C1orf77	0	3
BC068496.1	IOH62478	TBC domain-containing protein kinase-like protein	0	2
BC066316.1	IOH40103	60S ribosomal protein L26	1	2
BC069023.1	IOH40776	apolipoprotein B mRNA editing enzyme, catalytic polypeptide-like 3H (APOBEC3H)	0	2
NM_144971.1	IOH10719	hypothetical protein MGC26641 (MGC26641)	1	2
NM_019846.3	IOH40714	chemokine (C-C motif) ligand 28 (CCL28), transcript variant 1	0	1
NM_054016.1	IOH6575	FUS interacting protein (serine/arginine-rich) 1 (FUSIP1), transcript variant 2	0	2
BC014323.1	IOH13941	B-cell receptor-associated protein 31 (BCAP31)	1	2
NM_019895.1	IOH11450	claudin domain containing 1 (CLDND1), transcript variant 2	0	1
NM_198217.1	IOH59743	Inhibitor of growth protein 1	0	2
NM_000877.2	IOH40164	Interleukin-1 receptor type I	0	1
BC031224.1	IOH62167	Nucleoside diphosphate-linked moiety X motif 13	0	1
BC050622.1	IOH27083	receptor accessory protein 4 (REEP4)	0	1
BC007840.2	IOH6710	succinate dehydrogenase complex, subunit B, iron sulfur (Ip) (SDHB)	0	0
BC017407.1	IOH14158	zinc finger protein 266 (ZNF266)	0	1
NM_020235.2	IOH44025	bobby sox homolog (Drosophila) (BBX)	0	4
BC008145.1	IOH3304	APEX nuclease (multifunctional DNA repair enzyme) 1 (APEX1)	0	1
NM_006010.2	IOH59542	Protein ARMET	0	1
BC010078.1	IOH13024	Retinoid-inducible serine carboxypeptidase	0	3
NM_002709.1	IOH5281	protein phosphatase 1, catalytic subunit, beta isoform (PPP1CB), transcript variant 1	0	2
NM_000995.2	IOH4459	ribosomal protein L34 (RPL34), transcript variant 1	0	2
NM_032506.1	IOH40533	KIAA1841 (KIAA1841)	0	2
BC000645.1	IOH4240	solute carrier family 39 (zinc transporter), member 7 (SLC39A7)	0	1
NM_014045.3	IOH41955	low density lipoprotein receptor-related protein 10 (LRP10)	1	2
NM_014551.3	IOH3660	non-SMC condensin II complex, subunit H2 (NCAPH2), transcript variant 1	2	2
BC035365.1	IOH28679	Sialic acid-binding Ig-like lectin 9	1	1
NM_003415.1	IOH52993	Zinc finger protein 268	0	1
BC103660.1	IOH63319	Putative RNA-binding protein 15	0	1
NM_138801.1	IOH10118	galactose mutarotase (aldose 1-epimerase) (GALM)	1	1
NM_000850.2	IOH9886	glutathione S-transferase M4 (GSTM4), transcript variant 1	0	1
BC017959.1	IOH12310	chromosome 2 open reading frame 47 (C2orf47)	2	5
BC053901.1	IOH29032	zinc finger protein 280A (SUHW1)	0	5
BC036109.1	IOH27253	SECIS binding protein 2 (SECISBP2)	3	6
NM_057749.1	IOH43526	cyclin E2 (CCNE2)	1	5
NM_005307.1		G protein-coupled receptor kinase 4	1	3
BC016647.1	IOH11399	coiled-coil domain containing 69, mRNA (cDNA clone MGC:16844 IMAGE:4342371), complete cds.	1	3
NM_153822.1	IOH41107	proteasome (prosome, macropain) 26S subunit, non-ATPase, 4 (PSMD4), transcript variant 2	1	3
NM_172251.1	IOH39983	mitochondrial ribosomal protein L54 (MRPL54), nuclear gene encoding mitochondrial protein	1	3
BC036096.2	IOH27280	zinc finger protein 18 (ZNF18)	1	2
BC002606.1	IOH4132	PDZ domain-containing protein 4	0	2
BC013879.1		Serine/threonine-protein kinase PLK2	2	3
BC050614.1	IOH27013	RNA methyltransferase-like protein 1	1	3
NM_020530.2	IOH13456	oncostatin M (OSM)	1	3
BC001780.1	IOH4955	Uncharacterized methyltransferase WBSCR22	0	3
NM_033111.2	IOH44850	NEDD4-binding protein 2-like 2	1	3
NM_032848.1	IOH13466	chromosome 12 open reading frame 52 (C12orf52)	0	2
XM_086879.4	IOH43381	PREDICTED: Homo sapiens hypothetical LOC150371 (LOC150371)	0	3
NM_016188.3	IOH2230	actin-like 6B (ACTL6B)	0	1
NM_182756.2	IOH53788	speedy homolog A (Drosophila) (SPDYA), transcript variant 2	0	2
NM_002359.2	IOH13933	Transcription factor MafG	0	1
NM_016487.1	IOH12876	chromosome 6 open reading frame 203 (C6orf203)	0	1
BC013296.2	IOH27773	40S ribosomal protein S6	0	1
BC065552.1	IOH40470	isoleucyl-tRNA synthetase (IARS)	0	1
NM_031496.1	IOH4571	protocadherin alpha 2 (PCDHA2), transcript variant 3	0	1
BC020955.1	IOH10359	TBC1 domain family, member 23 (TBC1D23)	1	2
NM_203286.1	IOH35592	poliovirus receptor-related 1 (herpesvirus entry mediator C) (PVRL1), transcript variant 3	1	1
NM_014565.1	IOH28391	Olfactory receptor 1A1	0	1
NM_006607.1	IOH40244	pituitary tumor-transforming 2 (PTTG2)	0	3
BC000903.2	IOH2920	High mobility group protein B2	1	4
NM_174938.3	IOH27753	FERM domain-containing protein 3	0	2
NM_002732.2		protein kinase, cAMP-dependent, catalytic, gamma (PRKACG)	0	2
BC020651.1	IOH12789	mitochondrial ribosomal protein L35 (MRPL35)	0	2
NM_000690.1	IOH4924	aldehyde dehydrogenase 2 family (mitochondrial) (ALDH2), nuclear gene encoding mitochondrial protein	0	2
NM_005617.2	IOH10433	ribosomal protein S14 (RPS14), transcript variant 3	1	1
BC004876.1	IOH5626	Protein MCM10 homolog	2	7
BC003070.1	IOH4586	Trans-acting T-cell-specific transcription factor GATA-3	1	4
BC028672.1	IOH14574	chromosome 15 open reading frame 15 (C15orf15)	3	6
BC035348.1	IOH28673	cytoplasmic polyadenylation element binding protein 1 (CPEB1)	2	4
BC042193.1	IOH26104	G patch domain containing 2 (GPATCH2)	3	5
NM_016505.2	IOH6093	zinc finger, CCHC domain containing 17 (ZCCHC17)	1	4
NM_002595.1		Serine/threonine-protein kinase PCTAIRE-2	1	3
BC009829.1	IOH12161	Histone deacetylase complex subunit SAP30L	1	3
BC022983.1	IOH10747	ligand of numb-protein X 1 (LNX1)	0	3
BC047411.1	IOH26516	tubulin tyrosine ligase-like family, member 2 (TTLL2)	2	5
BC063275.1	IOH40423	eukaryotic translation initiation factor 2C, 1 (EIF2C1)	0	3
NM_014477.2	IOH22106	chromosome 20 open reading frame 10 (C20orf10)	1	3
BC034696.1	IOH22151	syntaxin 19 (STX19)	2	3
NM_001021.2	IOH27847	ribosomal protein S17 (RPS17)	4	5
NM_002201.3	IOH6793	interferon stimulated exonuclease gene 20kDa (ISG20)	1	3
NM_012199.2	IOH55724	Eukaryotic translation initiation factor 2C 1	0	2
BC010929.1	IOH12868	LIM domain binding 3 (LDB3)	0	1
NM_000755.2	IOH52480	Carnitine O-acetyltransferase	0	1
NM_003495.2	IOH12149	histone cluster 1, H4i (HIST1H4I)	1	2
NM_024046.1		CaM kinase-like vesicle-associated (CAMKV)	1	2
NM_007268.1	IOH10254	V-set and immunoglobulin domain containing 4 (VSIG4), transcript variant 1	1	2
NM_017866.3	IOH40588	transmembrane protein 70 (TMEM70), transcript variant 1	0	1
BC016703.1	IOH13173	hypothetical protein FLJ20581 (FLJ20581)	2	2
BC006550.1	IOH6089	RNA binding motif protein, X-linked (RBMX)	1	1
NM_024036.3	IOH23019	leucine rich repeat and fibronectin type III domain containing 4 (LRFN4)	0	1
NM_147197.2	IOH40750	WAP four-disulfide core domain 11 (WFDC11)	2	1
NM_032570.1	IOH12288	NPC-related protein NAG73 (NAG73)	0	1
NM_005371.2	IOH4172	methyltransferase like 1 (METTL1), transcript variant 1	1	2
BC070154.1	IOH63011	Non-histone chromosomal protein HMG-14	3	5
NM_003089.4	IOH40192	small nuclear ribonucleoprotein 70kDa polypeptide (RNP antigen) (SNRP70)	3	7
BC005982.1	IOH7502	peptidylprolyl isomerase A (cyclophilin A) (PPIA)	3	5
NM_003137.2		SFRS protein kinase 1 (SRPK1)	2	4
NM_022551.2	IOH41520	ribosomal protein S18 (RPS18)	3	5
BC050546.1	IOH26928	MYB binding protein (P160) 1a (MYBBP1A)	3	2
NM_014702.1	IOH21412	KIAA0408 (KIAA0408)	1	2
NM_021158.1		tribbles homolog 3 (Drosophila) (TRIB3)	2	2
NM_152269.1	IOH10365	Uncharacterized protein C12orf65	3	3
NM_002737.1		protein kinase C, alpha (PRKCA); see catalog number for detailed information on wild-type or point mutant status	0	3
BC003376.1	IOH2942	ELAV (embryonic lethal, abnormal vision, Drosophila)-like 1 (Hu antigen R) (ELAVL1)	3	2
NM_138414.1	IOH10524	coiled-coil domain containing 101 (CCDC101)	3	5
NM_006869.1	IOH21856	centaurin, alpha 1 (CENTA1)	0	2
NM_032784.2	IOH12753	R-spondin 3 homolog (Xenopus laevis) (RSPO3)	0	2
NM_025128.3	IOH45812	MUS81 endonuclease homolog (S. cerevisiae) (MUS81)	4	2
BC000997.2	IOH2939	splicing factor, arginine/serine-rich 7, 35kDa (SFRS7)	3	0
NM_148179.1	IOH23094	chromosome 9 open reading frame 23 (C9orf23), transcript variant 2	0	1
BC043193.2	IOH25850	chromosome 4 open reading frame 18 (C4orf18)	0	1
NM_001031715.1	IOH26896	IQ motif containing H (IQCH), transcript variant 1	1	2
NM_025136.1	IOH6524	optic atrophy 3 (autosomal recessive, with chorea and spastic paraplegia) (OPA3), transcript variant 2	1	1
NM_001895.1		casein kinase 2, alpha 1 polypeptide (CSNK2A1), transcript variant 2	2	6
NM_152571.2	IOH42384	Uncharacterized protein C9orf163	4	5
NM_001894.2	IOH21160	casein kinase 1, epsilon (CSNK1E), transcript variant 2	4	5
BC041414.1	IOH25837	chromosome 10 open reading frame 72 (C10orf72)	4	4
BC029608.1	IOH21623	rapamycin-insensitive companion of mTOR (RICTOR)	2	4
BC059379.1	IOH29254	solute carrier family 17 (sodium-dependent inorganic phosphate cotransporter), member 7 (SLC17A7)	4	4
NM_024677.3	IOH22080	NOL1/NOP2/Sun domain family, member 7 (NSUN7)	3	4
NM_175924.2	IOH26372	Immunoglobulin-like domain-containing receptor 1	3	4
BC014181.1	IOH12954	coenzyme Q6 homolog, monooxygenase (S. cerevisiae) (COQ6)	1	3
BC015932.2	IOH10047	interferon-induced protein 44-like (IFI44L)	3	4
BC047703.2	IOH26704	phospholipase A1 member A (PLA1A)	1	5
BC006206.2	IOH46182	NIK and IKK{beta} binding protein (NIBP)	2	1
NM_000529.1	IOH28387	melanocortin 2 receptor (adrenocorticotropic hormone) (MC2R)	0	2
BC010907.1	IOH12088	PAK1 interacting protein 1 (PAK1IP1)	3	5
NM_004503.2	IOH42979	homeobox C6 (HOXC6), transcript variant 1	3	2
NM_031303.1	IOH45470	katanin p60 subunit A-like 2 (KATNAL2)	4	5
BC040844.1	IOH26310	synaptotagmin binding, cytoplasmic RNA interacting protein (SYNCRIP)	4	0
BC064913.1	IOH40472	protein phosphatase 1, regulatory (inhibitor) subunit 13 like (PPP1R13L)	2	3
BC022429.1	IOH23036	Lyrm7 homolog (mouse) (LYRM7)	1	3
NM_016287.2	IOH43530	heterochromatin protein 1, binding protein 3 (HP1BP3)	3	6
NM_006924.3	IOH11039	splicing factor, arginine/serine-rich 1 (splicing factor 2, alternate splicing factor) (SFRS1), transcript variant 1	3	6
NM_174926.1	IOH21428	transmembrane protein 136 (TMEM136)	1	2
NM_080414.1	IOH42243	vacuolar protein sorting 16 homolog (S. cerevisiae) (VPS16), transcript variant 2	5	6
NM_138401.2	IOH14104	family with sequence similarity 125, member A (FAM125A)	5	3
BC036723.1	IOH22599	Fc fragment of IgG, low affinity IIIa, receptor (CD16a) (FCGR3A)	4	4
NM_004965.3	IOH4772	high-mobility group nucleosome binding domain 1 (HMGN1)	6	5
NM_000200.1	IOH12986	histatin 3 (HTN3)	2	1
BC022419.1	IOH23032	putative homeodomain transcription factor 2 (PHTF2)	5	5
BC032715.1	IOH21958	Bardet-Biedl syndrome 9 (BBS9)	4	4
NM_014065.2	IOH43942	Protein asteroid homolog 1	3	4
NM_003992.1		Dual specificity protein kinase CLK3	4	6
BC022077.1	IOH22412	kelch domain containing 9 (KARCA1)	8	5
NM_018910.2	IOH29741	protocadherin alpha 7 (PCDHA7), transcript variant 1	0	4
NM_004586.1		ribosomal protein S6 kinase, 90kDa, polypeptide 3 (RPS6KA3)	0	2
NM_015554.1	IOH44553	glucuronic acid epimerase (GLCE)	0	3
BC009819.1	IOH12608	UDP-glucuronic acid decarboxylase 1	0	3
NM_032342.1	IOH6569	chromosome 9 open reading frame 125 (C9orf125)	0	1
NM_004262.1	IOH35723	transmembrane protease, serine 11D (TMPRSS11D)	0	1
NM_138371.1	IOH7011	Protein FAM113B	0	1
BC010876.1	IOH9862	nei endonuclease VIII-like 1 (E. coli) (NEIL1)	0	2
NM_031290.1	IOH40382	coiled-coil domain containing 70 (CCDC70)	0	1
NM_018410.2	IOH5020	Holliday junction recognition protein	0	6
BC010697.1	IOH9799	RNA-binding protein 40	0	5
NM_003935.3	IOH54164	DNA topoisomerase 3-beta-1	0	2
BC044580.1	IOH26748	KIAA0391 (KIAA0391)	0	3
BC017180.2	IOH12250	Staphylococcal nuclease domain-containing protein 1	1	4
BC015628.1	IOH13638	4-aminobutyrate aminotransferase (ABAT)	0	1
BC035968.1	IOH27970	chloride intracellular channel 5 (CLIC5)	0	2
BC095406.1	IOH62661	Core histone macro-H2A.1	0	2
NM_002708.1	IOH4976	protein phosphatase 1, catalytic subunit, alpha isoform (PPP1CA), transcript variant 1	0	2
NM_003295.1	IOH25767	tumor protein, translationally-controlled 1 (TPT1)	0	2
BC068446.1	IOH40110	UDP glycosyltransferase 3 family, polypeptide A1 (UGT3A1)	0	2
NM_003138.1		Serine/threonine-protein kinase SRPK2	0	3
XM_042066.8		Mitogen-activated protein kinase kinase kinase 1	0	2
BC042628.1	IOH27650	serpin peptidase inhibitor, clade E (nexin, plasminogen activator inhibitor type 1), member 2 (SERPINE2)	0	2
NM_015942.3	IOH45791	MTERF domain containing 1 (MTERFD1)	0	2
BC022254.1	IOH14853	DNA cross-link repair 1C (PSO2 homolog, S. cerevisiae) (DCLRE1C)	0	1
BC009486.1	IOH22946	leucine rich repeat containing 8 family, member D (LRRC8D)	1	5
NM_144714.1	IOH11221	PP2C-like domain-containing protein C3orf48	0	2
NM_012153.1	IOH26169	ets homologous factor (EHF)	0	2
NM_152323.1	IOH21727	Spi-C transcription factor (Spi-1/PU.1 related) (SPIC)	0	2
NM_000557.2	IOH27548	Growth/differentiation factor 5	0	4
NM_021029.3	IOH4423	ribosomal protein L36a (RPL36A)	0	2
NM_033387.2	IOH26402	family with sequence similarity 78, member A (FAM78A)	1	2
NM_032490.2	IOH11134	chromosome 14 open reading frame 142 (C14orf142)	1	2
BC031281.1	IOH21611	tetratricopeptide repeat domain 16 (TTC16)	1	4
BC014486.1	IOH13590	CAP-Gly domain-containing linker protein 3	0	2
BC063137.1	IOH62857	[Pyruvate dehydrogenase [lipoamide]] kinase isozyme 2, mitochondrial	0	1
NM_003584.1	IOH53923	RNA/RNP complex-1-interacting phosphatase	0	1
NM_014562.2	IOH6924	orthodenticle homeobox 1 (OTX1)	0	0
NM_001569.2		Interleukin-1 receptor-associated kinase 1	0	1
NM_014011.4	IOH37917	suppressor of cytokine signaling 5 (SOCS5), transcript variant 1	0	3
BC010464.1	IOH9638	mitogen-activated protein kinase kinase kinase 3 (MAP3K3)	1	3
NM_002628.3	IOH58968	profilin 2 (PFN2), transcript variant 2, mRNA.	1	3
NM_020320.2	IOH14861	arginyl-tRNA synthetase 2, mitochondrial (RARS2)	0	0
BC070287.1	IOH40811	S-phase response (cyclin-related) (SPHAR)	0	1
NM_004593.1	IOH2936	splicing factor, arginine/serine-rich 10 (transformer 2 homolog, Drosophila) (SFRS10)	0	2
BC069568.1	IOH40320	tripartite motif-containing 46 (TRIM46)	0	2
NM_175733.2	IOH26388	synaptotagmin IX (SYT9)	1	0
BC041339.1	IOH25831	chromosome 22 open reading frame 25 (C22orf25)	0	2
NM_006857.1	IOH13197	putative nucleic acid binding protein RY-1 (RY1)	1	1
BC012881.1	IOH10296	cDNA clone MGC:17553 IMAGE:3463076, complete cds	0	0
NM_133494.1	IOH45126	NIMA (never in mitosis gene a)- related kinase 7 (NEK7)	0	2
BC037253.1	IOH27450	FERM domain containing 3 (FRMD3)	1	2
BC013073.1	IOH10173	transmembrane protein 183A (TMEM183A)	0	1
BC016614.1	IOH9750	PCI domain containing 2 (PCID2)	0	1
NM_024092.1	IOH3088	transmembrane protein 109 (TMEM109)	0	1
BC051301.1	IOH29359	TEA domain family member 2 (TEAD2)	0	1
NM_022912.1	IOH40034	Receptor expression-enhancing protein 1	0	1
BC036193.1	IOH27486	family with sequence similarity 26, member C (FAM26C)	0	1
BC056270.1	IOH29486	Methyltransferase-like protein 4	0	1
NM_015464.1	IOH7434	sclerostin domain containing 1 (SOSTDC1)	0	4
NM_023074.2	IOH7272	zinc finger protein 649 (ZNF649)	2	6
NM_003504.3	IOH6286	CDC45 cell division cycle 45-like (S. cerevisiae) (CDC45L)	0	3
BC015715.1	IOH10098	makorin, ring finger protein, 2 (MKRN2)	0	2
NM_001966.2	IOH62346	Peroxisomal bifunctional enzyme	0	2
NM_000983.3	IOH58958	60S ribosomal protein L22	0	2
NM_006337.3	IOH12378	microspherule protein 1 (MCRS1), transcript variant 1	0	2
NM_018135.2	IOH12060	mitochondrial ribosomal protein S18A (MRPS18A), nuclear gene encoding mitochondrial protein	1	2
NM_016618.1	IOH10031	lysine-rich coiled-coil 1 (KRCC1)	1	3
NM_152480.1	IOH12619	chromosome 19 open reading frame 23 (C19orf23)	0	1
BC016312.1	IOH27887	chromosome 15 open reading frame 15 (C15orf15)	0	2
BC018766.1	IOH13547	5,10-methylenetetrahydrofolate reductase (NADPH) (MTHFR)	0	3
BC012472.1	IOH11069	ubiquitin D (UBD)	0	2
NM_006925.2	IOH58606	Splicing factor, arginine/serine-rich 5	0	2
BC068537.1	IOH40089	serine palmitoyltransferase, long chain base subunit 1 (SPTLC1)	0	1
BC011857.2	IOH46160	immunoglobulin heavy constant mu (IGHM)	1	1
NM_013357.2	IOH35581	purine-rich element binding protein G (PURG), transcript variant A	0	2
NM_001261.2		cyclin K and cyclin-dependent kinase 9 (CDC2-related kinase) (CDK9): cyclin K and CDK9 sequences are seperated by -- (in the protein list file).	0	2
NM_001013.2	IOH5840	ribosomal protein S9 (RPS9)	0	2
NM_001005266.1	IOH59477	Dresden prostate carcinoma protein 2	0	1
NM_019069.3	IOH26403	WD repeat domain 5B (WDR5B)	0	2
BC021680.1	IOH12084	similar to AVLV472 (MGC23985)	0	0
P2634		protein kinase C, eta	0	2
NM_024743.2	IOH35920	UDP glucuronosyltransferase 2 family, polypeptide A3 (UGT2A3)	0	2
NM_015014.1	IOH23193	RNA binding motif protein 34 (RBM34)	2	2
NM_153207.2	IOH14301	AE binding protein 2 (AEBP2)	1	1
NM_002013.2	IOH14109	FK506 binding protein 3, 25kDa (FKBP3)	0	3
BC033242.1	IOH23274	methyl-CpG binding domain protein 1 (MBD1)	0	3
BC019080.2	IOH13432	porcupine homolog (Drosophila) (PORCN)	1	1
NM_002432.1	IOH21730	Myeloid cell nuclear differentiation antigen	1	2
NM_000906.1		Atrial natriuretic peptide receptor A	0	2
BC011779.2	IOH14539	cDNA clone IMAGE:3941306, partial cds	0	1
BC015479.1	IOH11268	PIN2-interacting protein 1 (PINX1)	0	2
NM_016073.2	IOH10649	hepatoma-derived growth factor, related protein 3 (HDGFRP3)	0	2
NM_020963.1	IOH4005	Mov10, Moloney leukemia virus 10, homolog (mouse) (MOV10)	0	2
NM_138342.2	IOH25758	hypothetical protein BC008326 (LOC89944)	0	1
NM_003792.1	IOH10852	endothelial differentiation-related factor 1 (EDF1), transcript variant alpha	0	1
BC029520.1	IOH22574	WD repeat, SAM and U-box domain-containing protein 1	0	1
BC001964.1	IOH3201	acyl-Coenzyme A dehydrogenase family, member 8 (ACAD8)	1	0
NM_017588.1	IOH4895	WD repeat domain 5 (WDR5), transcript variant 1	2	6
NM_021088.1	IOH6563	Zinc finger protein 2	2	6
NM_002731.1		cAMP-dependent protein kinase catalytic subunit beta	1	3
BC001132.1	IOH3853	DEAD (Asp-Glu-Ala-Asp) box polypeptide 54 (DDX54)	1	4
NM_003600.1		aurora kinase A (AURKA), transcript variant 2	0	3
NM_016599.2	IOH7360	myozenin 2 (MYOZ2)	1	5
NM_199337.1	IOH29411	similar to RIKEN cDNA 1810059G22 (LOC374395)	1	3
BC042195.1	IOH45999	malonyl CoA:ACP acyltransferase (mitochondrial) (MCAT)	2	4
BC022378.1	IOH13502	zinc finger with KRAB and SCAN domains 1 (ZKSCAN1)	0	2
NM_020319.1	IOH27320	ankyrin repeat and MYND domain containing 2 (ANKMY2)	0	2
BC000934.2	IOH2996	eukaryotic translation initiation factor 2, subunit 2 beta, 38kDa (EIF2S2)	0	2
NM_003092.3	IOH21977	small nuclear ribonucleoprotein polypeptide B'' (SNRPB2), transcript variant 1	3	5
NM_004552.1	IOH4963	NADH dehydrogenase (ubiquinone) Fe-S protein 5, 15kDa (NADH-coenzyme Q reductase) (NDUFS5)	0	3
NM_182970.2	IOH43687	regulating synaptic membrane exocytosis 4 (RIMS4)	1	2
NM_024708.2	IOH39832	ankyrin repeat and SOCS box-containing 7 (ASB7), transcript variant 1	1	3
BC013796.1	IOH21478	adaptor-related protein complex 2, mu 1 subunit (AP2M1)	1	2
NM_080840.1	IOH11085	protein tyrosine phosphatase, receptor type, A (PTPRA), transcript variant 2	1	3
NM_020961.2	IOH6104	KIAA1627 protein (KIAA1627)	0	3
NM_031446.2	IOH12400	Uncharacterized protein C18orf21	0	2
BC010904.1	IOH12069	DEP domain containing 1B (DEPDC1B)	1	2
BC001651.1	IOH3740	cell division cycle associated 8 (CDCA8)	0	1
NM_000410.2	IOH35337	Hereditary hemochromatosis protein	0	1
BC035359.1	IOH27405	sialic acid binding Ig-like lectin 6 (SIGLEC6)	3	4
NM_032112.1	IOH25749	mitochondrial ribosomal protein L43 (MRPL43), nuclear gene encoding mitochondrial protein, transcript variant 1	0	2
BC012926.1	IOH9695	EPS8-like 3 (EPS8L3)	3	6
NM_182691.1	IOH26788	SFRS protein kinase 2 (SRPK2), transcript variant 2	3	6
BC036054.2	IOH27217	chromosome 18 open reading frame 54 (C18orf54)	1	1
NM_006807.2	IOH4111	chromobox homolog 1 (HP1 beta homolog Drosophila ) (CBX1)	0	5
NM_018025.2	IOH6539	G patch domain containing 1 (GPATCH1)	1	5
NM_017646.3	IOH37769	tRNA isopentenyltransferase 1 (TRIT1)	1	2
BC014519.1	IOH40595	Calcium-binding mitochondrial carrier protein SCaMC-1	0	0
NM_002677.1	IOH27101	peripheral myelin protein 2 (PMP2)	3	5
NM_003677.3	IOH56971	Density-regulated protein	2	4
BC015904.1	IOH10110	mitochondrial ribosomal protein L10 (MRPL10)	0	3
NM_138463.1	IOH12071	TLC domain containing 1 (TLCD1)	1	1
Ro/SS-A Antigen		NA	0	4
BC002430.1	IOH4273	aldehyde dehydrogenase 3 family, member A2 (ALDH3A2)	0	2
NM_181837.1	IOH38202	origin recognition complex, subunit 3-like (yeast) (ORC3L), transcript variant 1	2	1
NM_032284.2	IOH46080	PRP38 pre-mRNA processing factor 38 (yeast) domain containing A (PRPF38A), transcript variant 1	2	1
NM_005155.5	IOH3929	palmitoyl-protein thioesterase 2 (PPT2), transcript variant 1	2	3
BC015725.1	IOH10141	Folliculin	1	1
NM_145793.1	IOH13552	GDNF family receptor alpha 1 (GFRA1), transcript variant 2	0	2
BC001121.2	IOH46072	deoxyguanosine kinase (DGUOK)	2	2
NM_017523.2	IOH45706	XIAP associated factor-1 (XAF1), transcript variant 1	1	2
BC010642.1	IOH9701	zinc finger protein 22 (KOX 15) (ZNF22)	2	6
NM_145063.1	IOH13839	chromosome 6 open reading frame 130 (C6orf130)	1	7
NM_001641.2	IOH5081	APEX nuclease (multifunctional DNA repair enzyme) 1 (APEX1), transcript variant 1	2	5
NM_022343.2	IOH59950	Golgi-associated plant pathogenesis-related protein 1	2	5
NM_020395.2	IOH13332	integrator complex subunit 12 (INTS12)	0	5
NM_007373.2	IOH26711	soc-2 suppressor of clear homolog (C. elegans) (SHOC2)	2	6
BC012104.1	IOH13179	purinergic receptor P2Y, G-protein coupled, 2 (P2RY2)	2	5
BC048970.1	IOH26893	tubulin tyrosine ligase-like family, member 7 (TTLL7)	1	5
BC012542.1	IOH14219	GINS complex subunit 1 (Psf1 homolog) (GINS1)	2	4
NM_144982.1	IOH12275	coiled-coil domain containing 131 (CCDC131)	0	4
BC015497.1	IOH11495	Transcriptional enhancer factor TEF-3	0	3
NM_001010874.2	IOH44524	steroid 5 alpha-reductase 2-like 2 (SRD5A2L2)	0	3
NM_180699.1	IOH44651	small nuclear ribonucleoprotein 35kDa (U11/U12) (SNRNP35), transcript variant 3, mRNA.	1	3
BC040106.1	IOH26285	hypothetical protein HSPC111 (HSPC111)	2	5
BC027607.1	IOH11737	zinc finger CCCH-type containing 14 (ZC3H14)	2	4
BC008406.1	IOH14434	CD36 molecule (thrombospondin receptor) (CD36)	2	4
BC093990.1	IOH62017	Sin3 histone deacetylase corepressor complex component SDS3	0	2
NM_015933.1	IOH3769	coiled-coil domain containing 72 (CCDC72)	2	7
NM_003524.2	IOH58715	Histone H2B type 1-H	3	5
NM_014280.1	IOH42939	DnaJ homolog subfamily C member 8	2	2
BC010919.1	IOH27800	ribosomal protein L35 (RPL35)	0	2
NM_006215.2	IOH12257	serpin peptidase inhibitor, clade A (alpha-1 antiproteinase, antitrypsin), member 4 (SERPINA4)	0	1
BC029224.1	IOH22788	Coiled-coil domain-containing protein 42A	2	5
NM_012432.2	IOH14791	SET domain, bifurcated 1 (SETDB1)	1	1
NM_017765.1	IOH11892	PQ loop repeat containing 2 (PQLC2), transcript variant 2	1	1
NM_170610.2	IOH40168	histone cluster 1, H2ba (HIST1H2BA)	3	6
NM_002106.2	IOH14825	H2A histone family, member Z (H2AFZ)	1	1
NM_003865.1	IOH40237	HESX homeobox 1 (HESX1)	2	3
BC017475.1	IOH14365	Tetratricopeptide repeat protein 15	0	1
NM_000060.2	IOH13161	Biotinidase	2	1
NM_001029.2	IOH4114	ribosomal protein S26 (RPS26)	2	2
NM_022650.1	IOH41794	RAS p21 protein activator (GTPase activating protein) 1 (RASA1), transcript variant 2	1	1
NM_013416.1	IOH5398	neutrophil cytosolic factor 4, 40kDa (NCF4), transcript variant 2	1	1
NM_173652.1	IOH22733	Uncharacterized protein C2orf58	0	1
BC041133.1	IOH26142	RAS-like, family 10, member B (RASL10B)	1	1
NM_016338.3	IOH21768	importin 11 (IPO11)	0	0
NM_018280.1	IOH41065	chromosome 22 open reading frame 26 (C22orf26)	3	2
NM_015488.1	IOH22386	paroxysmal nonkinesigenic dyskinesia (PNKD), transcript variant 1	0	3
BC030957.1	IOH23131	ankyrin 1, erythrocytic (ANK1)	0	2
NM_032350.3	IOH6347	Uncharacterized protein C7orf50	0	2
NM_030641.2	IOH26930	apolipoprotein L, 6 (APOL6)	0	1
BC021276.1	IOH13289	immunoglobulin heavy constant delta (IGHD)	2	2
BC020572.1	IOH11492	F-box/LRR-repeat protein 13	2	3
NM_153612.2	IOH35580	heparan sulfate (glucosamine) 3-O-sulfotransferase 5 (HS3ST5)	3	1
BC028151.1	IOH11514	splicing factor, arginine/serine-rich 17A (SFRS17A)	0	1
NM_153212.1	IOH22179	gap junction protein, beta 4 (GJB4)	1	1
NM_000214.1	IOH36569	jagged 1 (Alagille syndrome) (JAG1)	3	1
Histone-type IIA		NA	1	9
BC068514.1	IOH40543	NF-kappaB repressing factor (NKRF)	3	7
BC036029.1	IOH27232	ADAM metallopeptidase domain 22 (ADAM22)	3	7
BC005248.1	IOH7358	eukaryotic translation initiation factor 1A, Y-linked (EIF1AY)	2	5
BC000522.1	IOH3622	serpin peptidase inhibitor, clade F (alpha-2 antiplasmin, pigment epithelium derived factor), member 1 (SERPINF1)	3	6
NM_003384.1	IOH41408	vaccinia related kinase 1 (VRK1)	3	5
NM_001039724.1	IOH63165	Nostrin	3	5
NM_006398.2	IOH59996	Ubiquitin D	3	5
BC001555.1	IOH10965	peptidylprolyl isomerase G (cyclophilin G) (PPIG)	3	5
NM_006223.1	IOH7192	protein (peptidylprolyl cis/trans isomerase) NIMA-interacting, 4 (parvulin) (PIN4)	3	5
NM_001031.4	IOH58930	40S ribosomal protein S28	2	5
NM_006254.1		Protein kinase C delta type	1	5
NM_022048.1	IOH21026	casein kinase 1, gamma 1 (CSNK1G1)	3	5
BC029529.1	IOH27222	tubulin, beta 2C (TUBB2C)	3	5
NM_031412.1	IOH14808	GABA(A) receptor-associated protein like 1 (GABARAPL1)	2	5
NM_020661.1	IOH6382	activation-induced cytidine deaminase (AICDA)	3	6
NM_021146.2	IOH4956	angiopoietin-like 7 (ANGPTL7)	4	5
BC000497.1		CaM kinase-like vesicle-associated protein	2	4
BC002804.1	IOH5414	Mannosyl-oligosaccharide glucosidase	0	3
NM_080832.1	IOH40754	poly(A) binding protein, cytoplasmic 5 (PABPC5)	3	4
NM_014263.2	IOH14600	YME1-like 1 (S. cerevisiae) (YME1L1), nuclear gene encoding mitochondrial protein, transcript variant 3	3	4
BC047583.1	IOH26438	SPARC related modular calcium binding 2 (SMOC2)	4	3
NM_138775.1	IOH10820	alkB, alkylation repair homolog 8 (E. coli) (ALKBH8)	4	5
NM_003160.1		Serine/threonine-protein kinase 13	2	2
NM_017692.1	IOH4894	aprataxin (APTX), transcript variant 4	3	2
Histone_H2a(F2a2) and H4(F2a1)		NA	2	1
NM_004465.1	IOH40262	fibroblast growth factor 10 (FGF10)	3	2
NM_014055.2	IOH41832	intraflagellar transport 81 homolog (Chlamydomonas) (IFT81), transcript variant 1	3	3
BC011924.1	IOH12682	unkempt homolog (Drosophila)-like (UNKL)	3	6
NM_152460.2	IOH35340	chromosome 17 open reading frame 77 (C17orf77)	1	1
NM_000993.2	IOH14051	ribosomal protein L31 (RPL31), transcript variant 1	3	2
NM_001007067.1	IOH41337	syndecan binding protein (syntenin) (SDCBP), transcript variant 2	2	4
BC024001.2	IOH11161	leucine rich repeat containing 20 (LRRC20)	3	1
NM_206836.1	IOH45844	peroxisomal D3,D2-enoyl-CoA isomerase (PECI), transcript variant 2	4	5
NM_018132.3	IOH45979	centromere protein Q (CENPQ)	3	5
NM_052969.1	IOH12514	ribosomal protein L39-like (RPL39L)	3	5
NM_005282.1	IOH28363	G protein-coupled receptor 4 (GPR4)	2	1
BC021934.1	IOH27957	proline rich 14 (PRR14)	2	1
NM_144673.1	IOH13407	CKLF-like MARVEL transmembrane domain containing 2 (CMTM2)	1	3
NM_000984.2	IOH13591	ribosomal protein L23a (RPL23A)	4	1
NM_002128.2	IOH2937	high-mobility group box 1 (HMGB1)	3	4
NM_006674.2	IOH42052	HLA complex P5 (HCP5)	0	1
NM_022140.2	IOH38016	Band 4.1-like protein 4A	1	2
BC022230.1	IOH11174	phosphatidylinositol transfer protein, membrane-associated 1 (PITPNM1)	0	1
PV3500		casein kinase 1, epsilon (CSNK1E), transcript variant 2	1	3
NM_144602.1	IOH11852	chromosome 16 open reading frame 78 (C16orf78)	5	3
NM_015414.2	IOH4985	ribosomal protein L36 (RPL36), transcript variant 2	3	2
NM_138424.1	IOH9715	kinesin family member 12 (KIF12)	2	1
BC017115.1	IOH10111	DNA-directed RNA polymerase I subunit RPA1	3	2
XM_375456.2	IOH43380	Ataxin-7-like protein 3	3	7
NM_003769.2	IOH41184	splicing factor, arginine/serine-rich 9 (SFRS9)	4	7
NM_002129.2	IOH3826	high-mobility group box 2 (HMGB2)	3	7
NM_145174.1	IOH44767	DnaJ (Hsp40) homolog, subfamily B, member 7 (DNAJB7)	3	6
NM_002136.1	IOH3526	heterogeneous nuclear ribonucleoprotein A1 (HNRNPA1), transcript variant 1	3	6
NM_001997.2	IOH1655	Finkel-Biskis-Reilly murine sarcoma virus (FBR-MuSV) ubiquitously expressed (FAU)	3	5
BC001494.1	IOH14556	WD repeat domain 57 (U5 snRNP specific) (WDR57)	3	5
NM_013293.1	IOH9999	Transformer-2 protein homolog	3	5
NM_007208.2	IOH2930	mitochondrial ribosomal protein L3 (MRPL3), nuclear gene encoding mitochondrial protein	4	5
BC004248.1	IOH5475	bone morphogenetic protein 7 (osteogenic protein 1) (BMP7)	4	5
BC003360.1	IOH2892	DEAD (Asp-Glu-Ala-Asp) box polypeptide 18 (DDX18)	3	5
BC012094.1	IOH13126	RAB GTPase activating protein 1-like (RABGAP1L)	4	5
NM_016648.1	IOH41297	La ribonucleoprotein domain family, member 7 (LARP7), transcript variant 1	5	5
NM_020783.2	IOH22458	synaptotagmin IV (SYT4)	5	5
NM_006217.2	IOH11838	serpin peptidase inhibitor, clade I (pancpin), member 2 (SERPINI2)	2	4
BC042943.2	IOH25858	USP6 N-terminal like (USP6NL)	4	5
NM_016483.3	IOH22255	PHD finger protein 7 (PHF7), transcript variant 1	3	3
NM_173518.2	IOH40744	chromosome 8 open reading frame 45 (C8orf45)	5	3
BC020966.1	IOH10379	Ectonucleoside triphosphate diphosphohydrolase 5	4	4
BC032862.1	IOH27139	suppressor of cytokine signaling 5 (SOCS5)	3	3
NM_012108.1	IOH13463	signal transducing adaptor family member 1 (STAP1)	4	2
NM_152551.2	IOH43711	chromosome 6 open reading frame 151 (C6orf151)	5	4
NM_005879.2	IOH3484	TRAF interacting protein (TRAIP)	2	2
NM_016167.3	IOH40609	nucleolar protein 7, 27kDa (NOL7)	5	5
NM_025161.2	IOH14763	Fanconi anemia-associated protein of 100 kDa	3	3
NM_024319.1	IOH5397	chromosome 1 open reading frame 35 (C1orf35)	3	2
NM_015317.1	IOH38629	pumilio homolog 2 (Drosophila) (PUM2)	2	6
BC038808.1	IOH25927	DNA dC->dU-editing enzyme APOBEC-3F	2	4
NM_006255.1		protein kinase C, eta	0	4
NM_020368.1	IOH6359	UTP3, small subunit (SSU) processome component, homolog (S. cerevisiae) (UTP3)	0	3
BC005056.1	IOH6527	Williams Beuren syndrome chromosome region 18 (WBSCR18)	1	3
NM_018052.2	IOH6786	Protein VAC14 homolog	0	2
NM_012279.1	IOH6492	zinc finger protein 346 (ZNF346)	0	3
BC010360.1	IOH12880	LMBR1 domain containing 1 (LMBRD1)	1	1
NM_018111.1	IOH57283	Putative uncharacterized protein FLJ10490	3	5
NM_003618.2		Mitogen-activated protein kinase kinase kinase kinase 3	0	2
NM_002938.2	IOH41414	ring finger protein 4 (RNF4)	4	5
BC062423.1	IOH40739	chromosome 7 open reading frame 41 (C7orf41)	4	5
NM_015696.2	IOH21874	glutathione peroxidase 7 (GPX7)	4	5
NM_198216.1	IOH44674	small nuclear ribonucleoprotein polypeptides B and B1 (SNRPB), transcript variant 1, mRNA.	0	2
NM_152618.2	IOH55646	Bardet-Biedl syndrome 12 protein	2	1
NM_014366.1	IOH4189	guanine nucleotide binding protein-like 3 (nucleolar) (GNL3), transcript variant 1	2	2
NM_024561.1	IOH11647	NMDA receptor regulated 1-like (NARG1L), transcript variant 1	1	1
BC056508.1	IOH29456	variable charge, Y-linked 1B (VCY)	5	6
BC010947.1	IOH14455	signal recognition particle 19kDa (SRP19)	5	5
NM_022755.2	IOH10937	inositol 1,3,4,5,6-pentakisphosphate 2-kinase (IPPK)	3	5
NM_023936.1	IOH4498	mitochondrial ribosomal protein S34 (MRPS34), nuclear gene encoding mitochondrial protein	3	5
BC018060.1	IOH11303	Ras-like without CAAX 2 (RIT2)	3	5
NM_017506.1	IOH39552	olfactory receptor, family 7, subfamily A, member 5 (OR7A5)	5	4
NM_005586.2	IOH6705	MyoD family inhibitor (MDFI)	5	5
NM_006861.2	IOH10011	RAB35, member RAS oncogene family (RAB35)	4	4
NM_177559.2	IOH13704	casein kinase 2, alpha 1 polypeptide (CSNK2A1), transcript variant 1	3	3
NM_005855.1	IOH4168	receptor (G protein-coupled) activity modifying protein 1 (RAMP1)	4	4
NM_000975.2	IOH1740	ribosomal protein L11 (RPL11)	5	2
NM_007054.1	IOH26900	kinesin family member 3A (KIF3A)	1	2
BC013935.1	IOH12458	mRNA similar to hypothetical protein FLJ21394 (cDNA clone MGC:24280 IMAGE:3950761), complete cds	1	2
BC005174.1	IOH4625	activating transcription factor 5 (ATF5)	3	1
BC033005.1	IOH22281	PCTAIRE protein kinase 2 (PCTK2)	4	4
BC002733.2	IOH5365	chromosome 1 open reading frame 77 (C1orf77)	5	5
NM_002402.1	IOH3706	mesoderm specific transcript homolog (mouse) (MEST), transcript variant 1	1	1
BC039825.1	IOH26189	male germ cell-associated kinase (MAK)	1	2
BC026961.1	IOH22837	microphthalmia-associated transcription factor (MITF)	7	10
NM_022100.1	IOH12979	mitochondrial ribosomal protein S14 (MRPS14), nuclear gene encoding mitochondrial protein	6	7
NM_175887.2	IOH27336	proline rich 15 (PRR15)	5	6
NM_001022.3	IOH4572	ribosomal protein S19 (RPS19)	5	6
NM_139062.1	IOH23025	casein kinase 1, delta (CSNK1D), transcript variant 2	6	5
BC000877.1	IOH3268	arginine vasopressin-induced 1 (AVPI1)	4	3
NM_178814.2	IOH11915	adaptor-related protein complex 1, sigma 3 subunit (AP1S3)	5	4
XM_088679.2	IOH43003	Spermatid nuclear transition protein 4	6	8
NM_024749.1	IOH27040	Vasohibin-2	2	4
NM_032514.2	IOH10043	microtubule-associated protein 1 light chain 3 alpha (MAP1LC3A), transcript variant 1	4	5
NM_198926.1	IOH35421	chromosome 1 open reading frame 183 (C1orf183), transcript variant 2	3	1
NM_001319.5	IOH10417	casein kinase 1, gamma 2 (CSNK1G2)	4	3
BC036390.2	IOH22063	UDP-N-acetyl-alpha-D-galactosamine:polypeptide N-acetylgalactosaminyltransferase 4 (GalNAc-T4) (GALNT4)	2	0
NM_017503.2	IOH12519	surfeit 2 (SURF2)	6	3
BC024244.1	IOH40194	splA/ryanodine receptor domain and SOCS box containing 3 (SPSB3)	4	5
BC007888.1	IOH29315	eukaryotic translation initiation factor 2, subunit 2 beta, 38kDa (EIF2S2)	7	6
NM_006756.2	IOH42106	transcription elongation factor A (SII), 1 (TCEA1), transcript variant 1	5	1
BC039729.1	IOH26128	RIO kinase 3 (yeast) (RIOK3)	3	2
NM_003517.2	IOH29296	histone cluster 2, H2ac (HIST2H2AC)	6	6
BC015413.1	IOH10971	Ropporin-1B	4	5
NM_198083.1	IOH40660	dehydrogenase/reductase (SDR family) member 4 like 2 (DHRS4L2)	4	4
BC017163.1	IOH10096	LUC7-like 2 (S. cerevisiae) (LUC7L2)	4	3
BC001088.1	IOH3839	cell division cycle 20 homolog (S. cerevisiae) (CDC20)	4	2
BC064945.1	IOH39953	SCY1-like 1 binding protein 1 (SCYL1BP1)	6	4
NM_012321.1	IOH3488	LSM4 homolog, U6 small nuclear RNA associated (S. cerevisiae) (LSM4)	5	2
NM_002945.2	IOH11757	replication protein A1, 70kDa (RPA1)	6	6
NM_002930.1	IOH54792	GTP-binding protein Rit2	0	3
XM_379149.1	IOH43693	PREDICTED: Homo sapiens hypothetical LOC401025 (LOC401025)	0	2
BC016879.1	IOH10754	chromosome 6 open reading frame 113 (C6orf113)	0	2
NM_017629.2	IOH38411	eukaryotic translation initiation factor 2C, 4 (EIF2C4)	0	2
NM_004489.3	IOH10241	G protein pathway suppressor 2 (GPS2)	0	1
NM_001015.2	IOH6920	ribosomal protein S11 (RPS11)	0	1
BC047363.1	IOH26485	DnaJ (Hsp40) homolog, subfamily C, member 16 (DNAJC16)	0	1
NM_000918.2	IOH9865	procollagen-proline, 2-oxoglutarate 4-dioxygenase (proline 4-hydroxylase), beta polypeptide (P4HB)	0	1
NM_001004.2	IOH6844	ribosomal protein, large, P2 (RPLP2)	0	1
BC022189.2	IOH40198	chromosome 17 open reading frame 47 (C17orf47)	0	2
BC028736.1	IOH28644	Glutamate receptor 2	0	2
NM_003031.3	IOH27546	E3 ubiquitin-protein ligase SIAH1	0	0
NM_023920.1	IOH34818	Taste receptor type 2 member 13	0	0
NM_001871.2	IOH11321	carboxypeptidase B1 (tissue) (CPB1)	0	1
NM_138770.1	IOH11292	Coiled-coil domain-containing protein 74A	0	1
BC015947.1	IOH10114	potassium voltage-gated channel, delayed-rectifier, subfamily S, member 3 (KCNS3)	0	0
BC060768.1	IOH29221	zinc finger protein 449 (ZNF449)	1	6
NM_001906.1	IOH7194	chymotrypsinogen B1 (CTRB1)	0	4
BC051377.1	IOH29416	1-acylglycerol-3-phosphate O-acyltransferase 6 (lysophosphatidic acid acyltransferase, zeta) (AGPAT6)	1	4
BC035494.2	IOH29313	origin recognition complex, subunit 3-like (yeast) (ORC3L)	0	2
NM_002754.3	IOH3435	mitogen-activated protein kinase 13 (MAPK13)	1	4
NM_016535.1	IOH4783	zinc finger protein 581 (ZNF581)	0	2
NM_004834.2		Mitogen-activated protein kinase kinase kinase kinase 4	0	3
NM_182631.1	IOH28980	hypothetical protein LOC348840 (LOC348840)	0	1
BC024184.2	IOH10751	germ cell-less homolog 1 (Drosophila)-like (GMCL1L)	0	1
NM_198526.1	IOH43902	zinc finger protein 710 (ZNF710)	1	3
NM_030613.2	IOH35803	zinc finger protein 2 homolog (mouse) (ZFP2)	0	2
BC006393.1	IOH6460	Carboxypeptidase Z	0	2
NM_002952.2	IOH10056	40S ribosomal protein S2	0	1
NM_207582.1	IOH40146	HERV-FRD provirus ancestral Env polyprotein (HERV-FRD)	1	2
NM_000262.1	IOH4589	N-acetylgalactosaminidase, alpha- (NAGA)	0	2
NM_018019.1	IOH4211	mediator complex subunit 9 (MED9)	1	4
BC017927.1	IOH13475	Endoplasmic reticulum aminopeptidase 2	1	2
NM_145183.1	IOH5614	PYD and CARD domain containing (PYCARD), transcript variant 3	0	0
NM_005748.3	IOH53848	YY1-associated factor 2	0	1
BC011556.1	IOH13000	DEAD (Asp-Glu-Ala-Asp) box polypeptide 20 (DDX20)	1	3
NM_032181.1	IOH13482	transmembrane protein 166 (TMEM166)	1	3
ENST00000318749	IOH28288	olfactory receptor, family 11, subfamily L, member 1 (OR11L1), mRNA	1	1
NM_139215.1	IOH40855	TAF15 RNA polymerase II, TATA box binding protein (TBP)-associated factor, 68kDa (TAF15), transcript variant 1	1	1
NM_178539.3	IOH42328	Protein FAM19A2	0	2
BC045706.1	IOH25899	Zinc finger matrin-type protein 1	0	2
NM_007013.3	IOH27251	WW domain containing E3 ubiquitin protein ligase 1 (WWP1)	1	2
BC015799.1	IOH10121	caspase 7, apoptosis-related cysteine peptidase (CASP7)	1	2
NM_024718.2	IOH40918	chromosome 9 open reading frame 86 (C9orf86)	1	2
BC006769.1	IOH3146	nucleolar and coiled-body phosphoprotein 1 (NOLC1)	1	2
BC032007.1	IOH22165	transmembrane 6 superfamily member 1 (TM6SF1)	0	1
BC013395.2	IOH40576	zinc finger protein 74 (ZNF74)	0	1
NM_005726.2	IOH12647	Ts translation elongation factor, mitochondrial (TSFM)	0	1
NM_173597.1	IOH35045	hypothetical protein FLJ37587 (FLJ37587)	0	1
NM_014046.2	IOH1899	mitochondrial ribosomal protein S18B (MRPS18B), nuclear gene encoding mitochondrial protein	0	1
NM_004336.1		BUB1 budding uninhibited by benzimidazoles 1 homolog (yeast) (BUB1)	0	1
BC053861.1	IOH28930	PHD finger protein 8 (PHF8)	0	1
BC057395.1	IOH28901	histidine acid phosphatase domain containing 2A (HISPPD2A)	0	1
NM_004302.3	IOH4418	activin A receptor, type IB (ACVR1B), transcript variant 1	1	0
BC000535.1	IOH4145	Suppressor of SWI4 1 homolog	0	3
BC001408.1	IOH4057	Golgi reassembly-stacking protein 2	1	3
NM_001015878.1	IOH60102	aurora kinase C (AURKC), transcript variant 1	1	3
NM_004094.2	IOH4059	eukaryotic translation initiation factor 2, subunit 1 alpha, 35kDa (EIF2S1)	0	2
BC094800.1	IOH62619	Jouberin	2	5
NM_152238.1	IOH10394	sorting nexin 7 (SNX7), transcript variant 2	2	5
NM_000979.2	IOH1766	60S ribosomal protein L18	0	2
BC054002.1	IOH28992	Uncharacterized protein C20orf177	0	2
BC003178.1	IOH5124	mutY homolog (E. coli) (MUTYH)	1	6
BC014592.1	IOH11286	N-acetylglucosamine-1-phosphate transferase, gamma subunit (GNPTG)	0	3
NM_005044.1		protein kinase, X-linked (PRKX)	0	2
NM_006439.3	IOH12221	Protein mab-21-like 2	0	1
NM_002710.1	IOH14587	protein phosphatase 1, catalytic subunit, gamma isoform (PPP1CC)	2	4
BC012564.1	IOH12090	transmembrane and coiled-coil domains 3 (TMCO3)	0	3
NM_003224.1	IOH29617	ADP-ribosylation factor related protein 1 (ARFRP1)	0	2
NM_014062.1	IOH39919	NIN1/RPN12 binding protein 1 homolog (S. cerevisiae) (NOB1)	0	2
NM_001001330.1	IOH40137	receptor accessory protein 3 (REEP3)	0	2
BC010887.1	IOH27768	REC8 homolog (yeast) (REC8)	2	4
NM_006332.1	IOH13656	interferon, gamma-inducible protein 30 (IFI30)	1	3
NM_145914.2	IOH26562	zinc finger and SCAN domain containing 21 (ZSCAN21)	1	2
NM_021107.1	IOH6073	mitochondrial ribosomal protein S12 (MRPS12), nuclear gene encoding mitochondrial protein, transcript variant 1	0	2
NM_000936.1	IOH14532	pancreatic lipase (PNLIP)	0	2
NM_138289.1	IOH10781	actin-related protein T1 (ACTRT1)	1	2
NM_152441.1	IOH11609	F-box and leucine-rich repeat protein 14 (FBXL14)	0	2
BC061699.1	IOH29429	glycosyltransferase-like domain containing 1 (GTDC1)	0	1
NM_005769.1	IOH40873	Carbohydrate sulfotransferase 4	0	2
NM_194290.1	IOH42276	cDNA FLJ42001 fis, clone SPLEN2029912 (LOC153684 protein) [Source:UniProtKB/TrEMBL;Acc:Q6ZVW3]	0	1
NM_001961.2	IOH39624	eukaryotic translation elongation factor 2 (EEF2)	1	2
NM_024552.1	IOH12136	LAG1 homolog, ceramide synthase 4 (LASS4)	0	2
BC009194.2	IOH13702	polymerase (DNA directed), gamma 2, accessory subunit (POLG2)	0	1
NM_003201.1	IOH42148	Transcription factor A, mitochondrial	0	0
BC073959.1	IOH62556	vacuolar protein sorting 16 homolog (S. cerevisiae), mRNA (cDNA clone MGC:87858 IMAGE:6182570), complete cds	1	5
BC026362.1	IOH11217	kinesin family member 19 (KIF19)	0	1
BC033130.1	IOH23218	lysyl oxidase-like 3 (LOXL3)	2	4
NM_004310.2	IOH13574	ras homolog gene family, member H (RHOH)	0	2
NM_153702.1	IOH21427	ELMO/CED-12 domain containing 2 (ELMOD2)	0	4
NM_144770.1	IOH22581	RNA binding motif protein 11 (RBM11)	0	1
NM_176884.1	IOH34871	taste receptor, type 2, member 43 (TAS2R43)	2	5
BC028135.1	IOH11327	purinergic receptor P2Y, G-protein coupled, 2 (P2RY2)	0	1
NM_175065.2	IOH35055	histone cluster 2, H2ab (HIST2H2AB)	1	2
NM_020638.2	IOH35360	Fibroblast growth factor 23	0	0
NM_015270.2	IOH40476	adenylate cyclase 6 (ADCY6), transcript variant 1	0	0
NM_152663.2	IOH26530	Ral GEF with PH domain and SH3 binding motif 2 (RALGPS2), transcript variant 2	2	1
NM_021137.2	IOH3751	tumor necrosis factor, alpha-induced protein 1 (endothelial) (TNFAIP1)	0	1
BC002519.2	IOH62827	Bifunctional polynucleotide phosphatase/kinase	2	4
NM_002732.2		protein kinase, cAMP-dependent, catalytic, gamma (PRKACG)	0	3
BC037344.2	IOH27705	recombination activating gene 1 (RAG1)	2	2
BC010349.1	IOH14182	sorting nexin 7 (SNX7)	2	1
PV3365		glycogen synthase kinase 3 beta (GSK3B)	2	2
NM_057089.1	IOH4579	adaptor-related protein complex 1, sigma 1 subunit (AP1S1), transcript variant 2	2	3
NM_145053.1	IOH13477	Ubiquilin-like protein	2	0
BC014146.2	IOH12774	adaptor-related protein complex 4, beta 1 subunit (AP4B1)	1	2
NM_054020.2	IOH39920	cation channel, sperm associated 2 (CATSPER2), transcript variant 1	1	2
NM_173471.1	IOH10493	S-adenosylmethionine mitochondrial carrier protein	0	1
NM_005622.3	IOH42133	acyl-CoA synthetase medium-chain family member 3 (ACSM3), transcript variant 1	0	2
NM_006306.2	IOH44953	structural maintenance of chromosomes 1A (SMC1A)	0	2
BC032454.1	IOH21666	serologically defined colon cancer antigen 8 (SDCCAG8)	2	2
BC050442.1	IOH26716	homeobox C4 (HOXC4)	1	1
BC028040.1	IOH11532	2',3'-cyclic nucleotide 3' phosphodiesterase (CNP)	2	1
BC000916.1	IOH2891	testis enhanced gene transcript (BAX inhibitor 1) (TEGT)	1	0
NM_030876.2	IOH28416	Olfactory receptor 5V1	1	0
NM_139245.2	IOH53944	Protein phosphatase 1L	1	0
NM_018145.1	IOH40027	family with sequence similarity 82, member C (FAM82C)	2	9
NM_206909.1	IOH43255	pleckstrin and Sec7 domain containing 3 (PSD3), transcript variant 2	0	4
NM_178151.1	IOH22620	doublecortex; lissencephaly, X-linked (doublecortin) (DCX), transcript variant 4	2	7
NM_017840.1	IOH3760	mitochondrial ribosomal protein L16 (MRPL16), nuclear gene encoding mitochondrial protein	0	3
NM_017988.4	IOH61176	SCY1-like 2 (S. cerevisiae) (SCYL2)	0	3
NM_023083.1	IOH29699	calpain 10 (CAPN10), transcript variant 1	1	4
NM_031483.3	IOH52904	E3 ubiquitin-protein ligase Itchy homolog	2	4
BC013116.1	IOH28618	CAP-Gly domain-containing linker protein 3	2	5
BC053617.1	IOH29004	B-cell CLL/lymphoma 10 (BCL10)	3	7
BC022081.2	IOH11952	THAP domain containing, apoptosis associated protein 3, with apparent retained intron	0	3
BC013013.2	IOH12505	zinc finger protein 526 (ZNF526)	1	2
NM_006137.4	IOH14100	CD7 molecule (CD7)	1	2
BC020766.1	IOH13795	C-reactive protein, pentraxin-related (CRP)	1	3
NM_003527.4	IOH58710	Histone H2B type 1-O	0	2
BC016640.1	IOH21476	synovial sarcoma, X breakpoint 5 (SSX5)	1	2
NM_020685.1	IOH13506	chromosome 3 open reading frame 14 (C3orf14)	0	2
NM_006351.1	IOH21740	translocase of inner mitochondrial membrane 44 homolog (yeast) (TIMM44)	1	1
BC033121.1	IOH23287	vacuolar protein sorting 13 homolog B (yeast) (VPS13B)	0	1
NM_006838.1	IOH11106	methionyl aminopeptidase 2 (METAP2)	1	1
NM_018956.2	IOH11209	chromosome 9 open reading frame 9 (C9orf9)	0	1
NM_175055.2	IOH35043	histone cluster 3, H2bb (HIST3H2BB)	1	1
BC002645.1	IOH5243	syntaxin 5 (STX5)	0	2
BC010634.1	IOH9775	SLU7 splicing factor homolog (S. cerevisiae) (SLU7)	2	3
NM_018186.2	IOH43824	chromosome 1 open reading frame 112 (C1orf112)	0	1
BC050655.1	IOH28920	PHD finger protein 20-like protein 1	0	1
BC017064.1	IOH11279	chromosome 3 open reading frame 52 (C3orf52)	0	2
BC094767.1	IOH62635	pyruvate kinase, muscle, mRNA (cDNA clone MGC:104654 IMAGE:5296639), complete cds	0	1
NM_014735.2	IOH36182	PHD finger protein 16 (PHF16), transcript variant 1	1	1
NM_138379.1	IOH3316	T-cell immunoglobulin and mucin domain containing 4 (TIMD4)	0	1
NM_002725.1	IOH21892	proline/arginine-rich end leucine-rich repeat protein (PRELP), transcript variant 1	3	6
NM_183009.1	IOH44132	Protein virilizer homolog	1	3
NM_001008723.1	IOH43999	chromosome 10 open reading frame 80 (C10orf80)	1	2
NM_004966.2	IOH3987	heterogeneous nuclear ribonucleoprotein F (HNRPF), transcript variant 3	2	1
BC010501.1	IOH10253	Catenin delta-1	0	1
BC032398.1	IOH21687	ATPase, H+ transporting, lysosomal V0 subunit a1 (ATP6V0A1)	0	0
NM_145013.1	IOH10783	chromosome 11 open reading frame 45 (C11orf45)	2	5
NM_207345.1	IOH59762	C-type lectin domain family 9 member A	1	2
NM_130782.1	IOH12138	regulator of G-protein signaling 18 (RGS18)	1	2
BC024187.2	IOH10699	DEAH (Asp-Glu-Ala-His) box polypeptide 40 (DHX40)	1	1
BC013778.1	IOH10676	solute carrier family 7, member 6 opposite strand (SLC7A6OS)	3	5
NM_019891.1	IOH26775	ERO1-like beta (S. cerevisiae) (ERO1LB)	3	5
BC001304.1	IOH45994	piccolo (presynaptic cytomatrix protein) (PCLO)	0	4
NM_144717.1	IOH10849	Interleukin-20 receptor beta chain	1	1
BC004234.1	IOH5230	Peroxisomal Lon protease homolog 2	0	1
NM_005668.3	IOH28983	CMP-N-acetylneuraminate-poly-alpha-2,8-sialyltransferase	1	0
BC008651.1	IOH3382	hypothetical protein MGC9913 (MGC9913)	2	4
NM_004656.2	IOH4938	BRCA1 associated protein-1 (ubiquitin carboxy-terminal hydrolase) (BAP1)	0	3
BC004292.1	IOH22899	PHD finger protein 15 (PHF15)	3	4
NM_001014439.1	IOH57350	Uncharacterized protein C8orf16	1	0
BC057813.1	IOH29137	gap junction protein, beta 7 (GJB7)	0	2
BC035028.1	IOH27133	serpin peptidase inhibitor, clade D (heparin cofactor), member 1 (SERPIND1)	1	3
NM_024046.1	IOH21132	CaM kinase-like vesicle-associated (CAMKV)	0	3
NM_017988.1		SCY1-like protein 2	1	2
BC031079.1	IOH22556	CUG triplet repeat, RNA binding protein 1 (CUGBP1)	1	2
NM_022839.2	IOH1783	mitochondrial ribosomal protein S11 (MRPS11), nuclear gene encoding mitochondrial protein, transcript variant 1	1	2
NM_182513.1	IOH44731	SPC24, NDC80 kinetochore complex component, homolog (S. cerevisiae) (SPC24)	1	2
BC022309.1	IOH14497	serpin peptidase inhibitor, clade C (antithrombin), member 1 (SERPINC1)	1	1
NM_033642.1	IOH36760	fibroblast growth factor 13 (FGF13), transcript variant 1B	1	1
NM_007250.2	IOH43163	Kruppel-like factor 8 (KLF8)	1	1
NM_174930.2	IOH11024	postmeiotic segregation increased 2-like 5 (PMS2L5)	0	1
BC036434.1	IOH62212	Serine/threonine-protein kinase VRK2	1	0
NM_032377.2	IOH6191	elongation factor 1 homolog (S. cerevisiae) (ELOF1)	3	6
BC009762.2	IOH14113	Tripartite motif-containing protein 41	2	5
BC064984.1	IOH40665	additional sex combs like 1 (Drosophila) (ASXL1)	3	6
NM_007278.1	IOH41289	GABA(A) receptor-associated protein (GABARAP)	3	6
BC021561.1	IOH14131	FACT complex subunit SPT16	3	5
BC000084.1	IOH4697	Protein SOLO	1	4
BC031227.1	IOH21600	WD repeat domain 88 (WDR88)	3	4
NM_004286.2	IOH14552	GTP binding protein 1 (GTPBP1)	3	6
BC007646.1	IOH7001	exonuclease NEF-sp (LOC81691)	0	4
NM_207440.1	IOH58673	Putative uncharacterized protein C13orf35	2	4
NM_014904.1	IOH35890	RAB11 family interacting protein 2 (class I) (RAB11FIP2)	2	5
NM_006805.2	IOH10215	heterogeneous nuclear ribonucleoprotein A0 (HNRNPA0)	2	3
BC009623.1	IOH9844	nucleophosmin (nucleolar phosphoprotein B23, numatrin) (NPM1)	0	3
ENST00000302281	IOH28260	olfactory receptor, family 4, subfamily A, member 4 pseudogene (OR4A4P) on chromosome 11	1	3
NM_001430.3	IOH28110	endothelial PAS domain protein 1 (EPAS1)	2	3
BC015586.2	IOH46065	laminin, gamma 1 (formerly LAMB2) (LAMC1)	1	3
BC007847.2	IOH6718	eukaryotic translation elongation factor 1 delta (guanine nucleotide exchange protein) (EEF1D)	2	3
NM_014955.2	IOH45543	KIAA0859 (KIAA0859), transcript variant 2	3	5
NM_001011670.1	IOH57330	Coiled-coil-helix-coiled-coil-helix domain-containing protein 7	1	3
NM_032338.2	IOH7537	chromosome 12 open reading frame 31 (C12orf31)	0	2
BC034784.1	IOH22773	zinc finger, MYND domain containing 11 (ZMYND11)	1	2
NM_020931.1	IOH26150	KIAA1586 (KIAA1586)	1	3
NM_080548.1	IOH4085	Tyrosine-protein phosphatase non-receptor type 6	0	2
BC026039.1	IOH40656	mitochondrial GTPase 1 homolog (S. cerevisiae) (MTG1)	1	2
NM_152850.2	IOH40494	phosphatidylinositol glycan anchor biosynthesis, class O (PIGO), transcript variant 2	2	3
NM_080737.1	IOH10026	synaptotagmin-like 4 (granuphilin-a) (SYTL4)	0	1
NM_182554.1	IOH11558	chromosome 10 open reading frame 53 (C10orf53), transcript variant 1	2	6
BC000381.2	IOH3454	TBP-like 1 (TBPL1)	1	1
BC035601.1	IOH27560	WWC family member 3 (WWC3)	1	1
NM_001023.2	IOH6083	ribosomal protein S20 (RPS20)	3	2
PV3615		mitogen-activated protein kinase kinase 2 (MAP2K2)	4	4
BC002488.1	IOH3970	SERPINE1 mRNA binding protein 1 (SERBP1)	0	1
BC000157.2	IOH2943	zinc finger protein 691 (ZNF691)	1	1
NM_001821.2	IOH36065	choroideremia-like (Rab escort protein 2) (CHML)	1	1
BC020803.1	IOH14817	developmentally regulated GTP binding protein 1 (DRG1)	1	1
BC013319.1	IOH12891	FYVE, RhoGEF and PH domain containing 6 (FGD6)	1	1
BC004236.2	IOH3887	ubiquitin-conjugating enzyme E2S (UBE2S)	2	0
NM_016940.1	IOH12821	RWD domain containing 2B (RWDD2B)	4	5
NM_024709.2	IOH27224	chromosome 1 open reading frame 115 (C1orf115)	2	1
NM_006896.2	IOH43102	homeobox A7 (HOXA7)	1	1
BC005216.1	IOH7266	elastase 3B, pancreatic (ELA3B)	0	1
NM_178536.2	IOH26188	lipocalcin 12 (LCN12)	1	1
NM_152912.3	IOH26907	mitochondrial translational initiation factor 3 (MTIF3)	2	2
AB065662.1	IOH28287	olfactory receptor, family 6, subfamily B, member 3 (OR6B3), mRNA	4	5
NM_003161.1		ribosomal protein S6 kinase, 70kDa, polypeptide 1 (RPS6KB1)	0	2
NM_021237.3	IOH50183	Selenoprotein K	1	0
BC006423.1		Serine/threonine-protein kinase 6	1	4
NM_205848.1	IOH43389	synaptotagmin VI (SYT6)	0	3
NM_016607.1	IOH7393	armadillo repeat containing, X-linked 3 (ARMCX3), transcript variant 1	2	4
BC029121.1	IOH22696	interleukin 12 receptor, beta 1 (IL12RB1)	0	2
NM_002314.2		LIM domain kinase 1	1	2
BC008337.1	IOH6947	limb region 1 homolog (mouse)-like (LMBR1L)	3	3
BC006376.1	IOH6481	N-myristoyltransferase 2 (NMT2)	2	3
NM_003179.2	IOH54998	Synaptophysin	1	3
NM_145265.1	IOH10426	coiled-coil domain containing 127 (CCDC127)	1	2
NM_004632.2	IOH3569	death associated protein 3 (DAP3), nuclear gene encoding mitochondrial protein, transcript variant 2	1	2
BC013352.1	IOH14736	HpaII tiny fragments locus 9c protein	0	3
NM_133341.1	IOH42565	RAD17 homolog (S. pombe) (RAD17), transcript variant 4	1	2
NM_023030.1		Fibroblast growth factor receptor 2	0	2
NM_145314.1	IOH10809	chromosome 10 open reading frame 49 (C10orf49)	2	2
BC032334.1	IOH21658	putative homeodomain transcription factor 2 (PHTF2)	4	3
NM_003776.1	IOH9812	mitochondrial ribosomal protein L40 (MRPL40), nuclear gene encoding mitochondrial protein	4	2
NM_004588.3	IOH22111	sodium channel, voltage-gated, type II, beta (SCN2B)	1	2
BC002890.1	IOH5715	Protein KRI1 homolog	2	2
BC017059.1	IOH11123	Gamma-interferon-inducible protein Ifi-16	1	2
BC053533.1	IOH39790	MTERF domain containing 2 (MTERFD2)	1	1
BC012919.1	IOH11176	Kruppel-like factor 7 (ubiquitous) (KLF7)	2	1
BC021701.1	IOH23015	chromosome 14 open reading frame 147 (C14orf147)	2	0
NM_007285.5	IOH7450	GABA(A) receptor-associated protein-like 2 (GABARAPL2)	2	6
BC005004.1	IOH4814	family with sequence similarity 64, member A (FAM64A)	3	6
BC039323.1	IOH28719	zinc finger protein 8 (ZNF8)	4	5
BC019039.2	IOH46089	Regulator of G-protein signaling 3	1	5
BC048969.1	IOH26897	TSPY-like 1 (TSPYL1)	3	6
NM_001896.2	IOH6369	casein kinase 2, alpha prime polypeptide (CSNK2A2)	2	5
NM_003516.2	IOH4867	histone cluster 2, H2aa3 (HIST2H2AA3)	3	6
NM_080743.2	IOH10836	serine-arginine repressor protein (35 kDa) (SRrp35)	3	5
NM_199123.1	IOH42083	SET domain containing 3 (SETD3), transcript variant 2	3	5
NM_002704.1	IOH12030	pro-platelet basic protein (chemokine (C-X-C motif) ligand 7) (PPBP)	2	4
NM_152398.1	IOH21775	OCIA domain containing 2 (OCIAD2), transcript variant 2	2	4
NM_016072.2	IOH10546	golgi transport 1 homolog B (S. cerevisiae) (GOLT1B)	3	5
NM_001009613.1	IOH58584	Sperm protein associated with the nucleus on the X chromosome N4	3	5
NM_000219.2	IOH54610	Potassium voltage-gated channel subfamily E member 1	3	5
NM_004927.1	IOH5582	mitochondrial ribosomal protein L49 (MRPL49), nuclear gene encoding mitochondrial protein	4	4
NM_018133.2	IOH38005	male-specific lethal 2-like 1 (Drosophila) (MSL2L1)	2	4
BC021234.2	IOH13820	cDNA clone IMAGE:4138335, partial cds	4	4
NM_000745.2	IOH21951	cholinergic receptor, nicotinic, alpha 5 (CHRNA5)	3	4
BC058039.1	IOH29487	spermatogenesis associated 19 (SPATA19)	2	4
NM_144717.2	IOH40859	interleukin 20 receptor beta (IL20RB)	4	5
NM_003718.2		Cell division cycle 2-like protein kinase 5	2	3
P2782		zeta-chain (TCR) associated protein kinase 70kDa (ZAP70), transcript variant 1	5	6
NM_005749.2	IOH22719	transducer of ERBB2, 1 (TOB1)	1	5
NM_007079.2	IOH4497	Protein tyrosine phosphatase type IVA 3	3	1
NM_173080.1	IOH34934	small proline-rich protein 4 (SPRR4)	2	1
NM_014061.3	IOH10824	melanoma antigen family H, 1 (MAGEH1)	3	6
BC047690.1	IOH28834	Ras-related protein M-Ras	2	1
NM_013342.1	IOH5505	TCF3 (E2A) fusion partner (in childhood Leukemia) (TFPT)	1	1
NM_005024.1	IOH35680	serpin peptidase inhibitor, clade B (ovalbumin), member 10 (SERPINB10)	1	0
NM_005030.2	IOH5070	polo-like kinase 1 (Drosophila) (PLK1)	1	3
BC001222.1	IOH4460	tripartite motif-containing 62 (TRIM62)	3	2
NM_014571.2	IOH6546	hairy/enhancer-of-split related with YRPW motif-like (HEYL)	3	5
NM_002738.2		Protein kinase C beta type	4	5
NM_032712.1	IOH6582	MGC13170 gene (MGC13170)	3	1
NM_021967.1	IOH45915	small EDRK-rich factor 1A (telomeric) (SERF1A)	4	5
NM_002119.1	IOH10959	major histocompatibility complex, class II, DO alpha (HLA-DOA)	3	0
NM_145006.1	IOH10868	sushi domain containing 3 (SUSD3)	4	2
BC033856.1	IOH21797	La ribonucleoprotein domain family, member 1 (LARP1)	1	3
BC000553.1	IOH4163	phospholipase D family, member 3 (PLD3)	0	1
BC044218.1	IOH26396	MHC class I polypeptide-related sequence B (MICB)	1	1
NM_182615.1	IOH21533	hypothetical protein MGC40069 (MGC40069)	3	0
BC010394.1	IOH12343	FCH and double SH3 domains 2 (FCHSD2)	1	1
BC029827.1	IOH28674	Down syndrome critical region gene 9 (DSCR9)	4	0
BC025776.1	IOH11913	Urotensin-2	3	2
BC012462.1	IOH10859	centromere protein I (CENPI)	1	1
NM_173574.1	IOH27216	zinc finger protein 683 (ZNF683)	2	1
BC015514.1	IOH11731	tissue factor pathway inhibitor (lipoprotein-associated coagulation inhibitor) (TFPI)	3	2
BC008623.1	IOH3309	roundabout, axon guidance receptor, homolog 3 (Drosophila) (ROBO3)	3	2
NM_005922.1		Mitogen-activated protein kinase kinase kinase 4	2	1
BC012760.2	IOH62834	Glycogen synthase kinase-3 beta	3	1
NM_021032.2	IOH35339	fibroblast growth factor 12 (FGF12), transcript variant 1	3	6
BC014428.1	IOH14661	mitochondrial translational release factor 1-like (MTRF1L)	4	5
NM_012095.2	IOH12776	adaptor-related protein complex 3, mu 1 subunit (AP3M1), transcript variant 2	3	5
NM_138349.2	IOH45741	Tumor protein p53-inducible protein 13	3	5
BC021930.1	IOH13703	KIAA1530 protein (KIAA1530)	4	6
NM_001165.3	IOH25952	baculoviral IAP repeat-containing 3 (BIRC3), transcript variant 1	3	6
NM_153246.2	IOH28619	Uncharacterized protein C6orf223	3	5
NM_001001794.1	IOH27259	family with sequence similarity 116, member B (FAM116B)	4	5
NM_002617.3	IOH11620	peroxisome biogenesis factor 10 (PEX10), transcript variant 2	4	5
BC053562.1	IOH29038	CREB regulated transcription coactivator 2 (CRTC2)	3	4
BC055088.1	IOH29459	39S ribosomal protein L21, mitochondrial	4	5
NM_004528.2	IOH7518	microsomal glutathione S-transferase 3 (MGST3)	3	5
NM_181703.1	IOH13936	gap junction protein, alpha 5, 40kDa (GJA5), transcript variant B	3	4
NM_000989.2	IOH3809	ribosomal protein L30 (RPL30)	3	3
BC000758.1	IOH3735	Coiled-coil domain-containing protein 28A	3	4
BC008073.2	IOH46125	family with sequence similarity 38, member A (FAM38A)	6	7
BC005955.1	IOH7485	chromosome 8 open reading frame 53 (C8orf53)	4	8
NM_032014.1	IOH13283	mitochondrial ribosomal protein S24 (MRPS24), nuclear gene encoding mitochondrial protein	4	4
BC017212.2	IOH13041	PHD finger protein 11 (PHF11)	4	4
BC000442.1		Serine/threonine-protein kinase 12	3	4
BC035314.1	IOH22146	brix domain containing 1 (BXDC1)	2	5
NM_005400.1		protein kinase C, epsilon (PRKCE)	0	3
NM_173695.1	IOH35866	chromosome X open reading frame 59 (CXorf59)	2	3
NM_153346.2	IOH27113	chromosome X open reading frame 20 (CXorf20)	6	7
NM_005801.2	IOH6916	eukaryotic translation initiation factor 1 (EIF1)	4	3
NM_000998.3	IOH1576	ribosomal protein L37a (RPL37A)	3	2
BC034275.1	IOH21410	Aspartate beta-hydroxylase domain-containing protein 1	4	6
BC008902.2	IOH46064	GRIP and coiled-coil domain-containing protein 1	3	1
BC050434.1	IOH26685	hypothetical protein FLJ10154 (FLJ10154)	0	4
NM_017897.1	IOH3173	3-oxoacyl-ACP synthase, mitochondrial (OXSM)	5	4
NM_182728.1	IOH45748	solute carrier family 7 (cationic amino acid transporter, y+ system), member 8 (SLC7A8), transcript variant 2	3	5
NM_015920.3	IOH57353	40S ribosomal protein S27-like protein	3	1
NM_004113.3	IOH34727	fibroblast growth factor 12 (FGF12), transcript variant 2	6	6
BC016768.1	IOH27892	nucleophosmin (nucleolar phosphoprotein B23, numatrin) (NPM1)	3	6
NM_000992.2	IOH1702	60S ribosomal protein L29	3	1
BC030640.1	IOH26818	ATPase, H+ transporting, lysosomal 56/58kDa, V1 subunit B2 (ATP6V1B2)	0	1
NM_012316.2	IOH10787	Importin subunit alpha-7	4	2
NM_134427.1	IOH45474	regulator of G-protein signaling 3 (RGS3), transcript variant 4	0	1
NM_148571.1	IOH41376	mitochondrial ribosomal protein L27 (MRPL27), nuclear gene encoding mitochondrial protein, transcript variant 2	4	2
NM_000999.2	IOH4263	ribosomal protein L38 (RPL38), transcript variant 1	4	2
NM_016047.1	IOH11089	splicing factor 3B, 14 kDa subunit (SF3B14)	2	3
NM_173621.1	IOH43334	chromosome 17 open reading frame 44 (C17orf44)	4	5
BC025963.1	IOH14668	acyl-Coenzyme A dehydrogenase, C-2 to C-3 short chain (ACADS)	1	2
BC001028.1	IOH4227	Magnesium transporter MRS2 homolog, mitochondrial	0	1
NM_003503.2		Cell division cycle 7-related protein kinase	2	0
NM_000361.2	IOH28988	thrombomodulin (THBD)	5	2
NM_018285.1	IOH10307	IMP3, U3 small nucleolar ribonucleoprotein, homolog (yeast) (IMP3)	0	1
NM_004635.2	IOH3889	mitogen-activated protein kinase-activated protein kinase 3 (MAPKAPK3)	0	1
BC007763.1	IOH6459	tubulin, gamma complex associated protein 3 (TUBGCP3)	2	3
NM_001864.2	IOH5372	cytochrome c oxidase subunit VIIa polypeptide 1 (muscle) (COX7A1)	0	1
NM_007029.1	IOH6398	stathmin-like 2 (STMN2)	6	1
NM_033332.1	IOH37777	CDC14 cell division cycle 14 homolog B (S. cerevisiae) (CDC14B), transcript variant 3	2	1
NM_006216.2	IOH12816	serpin peptidase inhibitor, clade E (nexin, plasminogen activator inhibitor type 1), member 2 (SERPINE2)	3	1
NM_018439.1	IOH23069	Impact homolog (mouse) (IMPACT)	4	2
BC015109.1	IOH14036	39S ribosomal protein L1, mitochondrial	3	2
NM_022333.1	IOH43130	TIA1 cytotoxic granule-associated RNA binding protein-like 1 (TIAL1), transcript variant 2	5	8
BC008819.1	IOH6323	nuclear receptor subfamily 1, group H, member 3 (NR1H3)	3	6
BC018823.2	IOH14860	splicing factor, arginine/serine-rich 5 (SFRS5)	4	6
NM_003135.1	IOH59899	Signal recognition particle 19 kDa protein	3	5
NM_004196.2		Cyclin-dependent kinase-like 1	5	5
NM_022720.5	IOH52788	DiGeorge syndrome critical region gene 8 (DGCR8)	3	5
NM_002690.1	IOH41443	polymerase (DNA directed), beta (POLB)	3	5
NM_003688.1		Peripheral plasma membrane protein CASK	3	5
BC066958.1	IOH61486	splicing factor, arginine/serine-rich 2, mRNA (cDNA clone MGC:87440 IMAGE:4837392), complete cds	3	5
NM_198489.1	IOH43342	coiled-coil domain containing 84 (CCDC84)	4	6
BC050683.1	IOH27027	zinc finger protein 410 (ZNF410)	4	6
BC010240.1	IOH10210	cathepsin B (CTSB)	4	5
BC006142.2	IOH6636	proteasomal ATPase-associated factor 1 (WDR71)	4	5
BC009250.1	IOH27775	guanine nucleotide binding protein-like 2 (nucleolar) (GNL2)	3	3
NM_023080.1	IOH13369	chromosome 8 open reading frame 33 (C8orf33)	3	3
BC031549.1	IOH21007	CDC-like kinase 1 (CLK1)	1	4
NM_021783.2	IOH23275	ectodysplasin A2 receptor (EDA2R)	2	5
BC030776.1	IOH22290	Intraflagellar transport protein 88 homolog	2	3
NM_021063.2	IOH58956	Histone H2B type 1-D	3	5
NM_015370.1	IOH35430	chromosome 22 open reading frame 31 (C22orf31)	1	4
BC065725.1	IOH62824	Rab9 effector protein with Kelch motifs	2	4
NM_001412.2	IOH3055	eukaryotic translation initiation factor 1A, X-linked (EIF1AX)	7	6
NM_031465.2	IOH6623	chromosome 12 open reading frame 32 (C12orf32)	5	6
NM_003160.1		Serine/threonine-protein kinase 13	5	5
BC021983.1	IOH27884	nucleophosmin (nucleolar phosphoprotein B23, numatrin) (NPM1)	4	5
NM_031901.2	IOH14006	mitochondrial ribosomal protein S21 (MRPS21), nuclear gene encoding mitochondrial protein, transcript variant 1	5	4
BC020962.1	IOH10372	sulfatase 2 (SULF2)	4	3
NM_033397.2	IOH27489	KIAA1754 (KIAA1754)	2	2
NM_032319.1	IOH6578	chromosome 2 open reading frame 7 (C2orf7)	1	0
BC046634.2	IOH25856	tubulin, gamma complex associated protein 3 (TUBGCP3)	1	2
NM_005567.2	IOH3566	lectin, galactoside-binding, soluble, 3 binding protein (LGALS3BP)	1	0
NM_032332.2	IOH6146	mitogen-activated protein kinase organizer 1 (MORG1), transcript variant 2	3	2
NM_006791.1	IOH3901	mortality factor 4 like 1 (MORF4L1), transcript variant 1	1	1
BC041157.1	IOH26254	thromboxane A synthase 1 (platelet, cytochrome P450, family 5, subfamily A) (TBXAS1)	1	0
BC021906.1	IOH25790	formin-like 1 (FMNL1)	4	7
NM_053006.1		testis-specific serine kinase 2 (TSSK2)	5	6
NM_139121.1	IOH46166	YY1 associated protein 1 (YY1AP1), transcript variant 5	5	6
NM_052852.1	IOH5816	zinc finger protein 486 (ZNF486)	6	6
NM_001008572.1	IOH45757	tubulin tyrosine ligase-like family, member 1 (TTLL1), transcript variant 2	8	8
BC004301.1	IOH5532	Krueppel-like factor 6	5	4
NM_018649.1	IOH10067	H2A histone family, member Y2 (H2AFY2)	5	4
NM_012387.1	IOH11317	peptidyl arginine deiminase, type IV (PADI4)	4	3
NM_003278.1	IOH14450	C-type lectin domain family 3, member B (CLEC3B)	5	3
NM_032853.2	IOH42561	melanoma associated antigen (mutated) 1 (MUM1)	2	4
NM_021803.1	IOH40163	interleukin 21 (IL21)	5	3
NM_138972.2	IOH39612	beta-site APP-cleaving enzyme 1 (BACE1), transcript variant b	2	4
NM_004111.4	IOH3530	flap structure-specific endonuclease 1 (FEN1)	6	3
NM_005435.2	IOH14526	Rho guanine nucleotide exchange factor (GEF) 5 (ARHGEF5)	5	1
NM_018375.1	IOH26708	solute carrier family 39 (zinc transporter), member 9 (SLC39A9)	4	4
BC030020.2	IOH22410	DEAD (Asp-Glu-Ala-Asp) box polypeptide 55 (DDX55)	5	1
NM_019103.1	IOH9858	zinc finger, matrin type 5 (ZMAT5), transcript variant 1	2	2
NM_021268.1	IOH35234	interferon, alpha 17 (IFNA17)	4	3
BC031090.1	IOH22578	RALY RNA binding protein-like (RALYL)	3	1
NM_003420.2	IOH9658	zinc finger protein 35 (ZNF35)	3	1
BC022524.1	IOH10757	fibroblast growth factor 12 (FGF12)	8	8
BC000190.1	IOH4410	zinc finger, C3HC-type containing 1 (ZC3HC1)	3	5
BC000953.2	IOH3022	RIO kinase 2 (yeast) (RIOK2)	4	6
NM_181515.1	IOH45751	mitochondrial ribosomal protein L21 (MRPL21), nuclear gene encoding mitochondrial protein, transcript variant 1	7	3
BC010172.2	IOH12518	Protein FAM41C-like	3	4
NM_021104.1	IOH13630	ribosomal protein L41 (RPL41), transcript variant 1	7	6
NM_203350.1	IOH36832	zinc finger, RAN-binding domain containing 2 (ZRANB2), transcript variant 1	4	3
NM_001803.1	IOH4221	CD52 molecule (CD52)	7	6
BC001280.1	IOH21165	Serine/threonine-protein kinase 6	3	2
NM_001284.2	IOH3063	AP-3 complex subunit sigma-1	4	2
BC053343.1	IOH28926	karyopherin alpha 2 (RAG cohort 1, importin alpha 1) (KPNA2)	5	6
PV4567		Protein tyrosine kinase 2 beta	4	3
BC067755.1	IOH40120	potassium channel tetramerisation domain containing 18 (KCTD18)	5	5
BC011239.1	IOH10245	transcobalamin II; macrocytic anemia (TCN2)	5	5
BC031073.1	IOH22537	poly (ADP-ribose) polymerase family, member 11 (PARP11)	7	6
NM_002578.1		p21 (CDKN1A)-activated kinase 3 (PAK3)	6	5
PV3186		protein kinase C, iota (PRKCI)	0	4
BC026325.1	IOH11158	nucleosome assembly protein 1-like 2 (NAP1L2)	0	3
NM_022347.1	IOH41552	interferon responsive gene 15 (IFRG15)	0	2
PV3313		Mitogen-activated protein kinase 1; see catalog number for detailed information on wild-type or point mutant status	0	1
NM_002376.2		MAP/microtubule affinity-regulating kinase 3 (MARK3)	0	1
BC011353.1	IOH9626	lipoprotein lipase (LPL)	0	2
NM_015963.4	IOH40797	THAP domain containing 4 (THAP4)	0	3
NM_031473.2	IOH40581	intraflagellar transport 81 homolog (Chlamydomonas) (IFT81), transcript variant 2	0	3
NM_174899.3	IOH25862	F-box protein 36 (FBXO36)	0	1
NM_003068.2	IOH10082	snail homolog 2 (Drosophila) (SNAI2)	0	1
NM_015364.2	IOH12176	lymphocyte antigen 96 (LY96)	0	1
NM_003878.1	IOH25778	gamma-glutamyl hydrolase (conjugase, folylpolygammaglutamyl hydrolase) (GGH)	0	1
NM_176817.1	IOH34868	Taste receptor type 2 member 38	0	0
PHC3015L		tumor necrosis factor (TNF superfamily, member 2) (TNF); see catalog number for detailed information on wild-type or point mutant status	0	1
BC033692.1	IOH21876	3-hydroxy-3-methylglutaryl-Coenzyme A reductase (HMGCR)	0	0
NM_152638.2	IOH11376	chromosome 12 open reading frame 12 (C12orf12)	0	0
BC008499.1	IOH7414	chromosome 15 open reading frame 15 (C15orf15)	1	6
BC028983.1	IOH22379	fragile X mental retardation, autosomal homolog 1 (FXR1)	0	2
NM_033416.1	IOH12991	IMP4, U3 small nucleolar ribonucleoprotein, homolog (yeast) (IMP4)	0	2
BC047022.1	IOH26602	MON1 homolog A (yeast) (MON1A)	1	3
BC057810.1	IOH29262	tubulin, alpha 3d (TUBA3D)	0	2
NM_183353.1	IOH14364	E3 ubiquitin-protein ligase RNF12	1	4
NM_016357.3	IOH38267	LIM domain and actin binding 1 (LIMA1)	1	3
NM_005324.3	IOH5791	H3 histone, family 3B (H3.3B) (H3F3B)	0	1
BC022471.1	IOH11199	myelin-associated oligodendrocyte basic protein (MOBP)	0	1
BC056253.1	IOH29437	iodotyrosine deiodinase (IYD)	1	2
BC033495.1	IOH27372	ankyrin repeat and MYND domain containing 1 (ANKMY1)	0	2
NM_024515.1	IOH5172	WD repeat domain 25 (WDR25)	1	4
BC025407.1	IOH11128	layilin (LAYN)	0	3
NM_003512.3	IOH14485	Histone H2A type 1-C	0	2
NM_020167.2	IOH10409	neuromedin U receptor 2 (NMUR2)	0	3
BC016790.1	IOH27885	KIAA1143 (KIAA1143)	1	4
NM_032009.1	IOH41831	protocadherin gamma subfamily A, 2 (PCDHGA2), transcript variant 2	1	4
BC008405.1	IOH7536	pregnancy specific beta-1-glycoprotein 4 (PSG4)	1	3
NM_018413.2	IOH12727	carbohydrate (chondroitin 4) sulfotransferase 11 (CHST11)	0	2
BC011550.1	IOH12657	RNA methyltransferase-like protein 1	0	2
BC067523.1	IOH62530	Collagenase 3	0	1
BC022957.1	IOH22373	chromosome 9 open reading frame 102 (C9orf102)	0	2
BC003604.1	IOH4978	Importin-9	0	1
NM_003856.1	IOH29806	interleukin 1 receptor-like 1 (IL1RL1), transcript variant 2	1	2
BC021101.1	IOH12547	mediator complex subunit 17 (CRSP6)	0	1
NM_031300.2	IOH3726	MAX dimerization protein 3 (MXD3)	0	0
NM_020998.2	IOH26579	Hepatocyte growth factor-like protein	0	1
NM_004772.1	IOH14022	chromosome 5 open reading frame 13 (C5orf13)	0	3
BC041031.1	IOH28000	mutS homolog 5 (E. coli) (MSH5)	1	1
BC026330.1	IOH11319	Membrane-bound transcription factor site-1 protease	1	1
NM_019884.1		Glycogen synthase kinase-3 alpha	0	3
BC034229.1	IOH21596	Zinc finger B-box domain containing protein 1	1	3
BC029611.1	IOH28688	Amyotrophic lateral sclerosis 2 chromosomal region candidate gene 4 protein	0	3
BC018090.1	IOH11156	zinc finger protein 641 (ZNF641)	1	1
BC006375.2	IOH6475	dual-specificity tyrosine-(Y)-phosphorylation regulated kinase 2 (DYRK2)	0	2
NM_032409.1		Serine/threonine-protein kinase PINK1, mitochondrial	0	2
BC032499.1	IOH21893	globoside alpha-1,3-N-acetylgalactosaminyltransferase 1 (GBGT1)	1	2
BC041332.2	IOH27756	gamma-aminobutyric acid (GABA) B receptor, 1 (GABBR1)	1	2
NM_002211.2	IOH21479	integrin, beta 1 (fibronectin receptor, beta polypeptide, antigen CD29 includes MDF2, MSK12) (ITGB1), transcript variant 1A	1	2
BC020652.1	IOH12790	pregnancy specific beta-1-glycoprotein 6 (PSG6)	0	1
BC031688.1	IOH22878	tektin 3 (TEKT3)	0	1
NM_030922.3	IOH12993	non imprinted in Prader-Willi/Angelman syndrome 2 (NIPA2), transcript variant 1	0	1
NM_001767.2	IOH22609	CD2 molecule (CD2)	0	1
BC020981.1	IOH10388	General transcription factor 3C polypeptide 2	0	1
BC036015.1	IOH27212	exostoses (multiple)-like 2 (EXTL2)	0	1
NM_032886.1	IOH6980	transmembrane protein 137 (TMEM137)	0	1
NM_013368.2	IOH1790	SERTA domain containing 3 (SERTAD3), transcript variant 1	1	0
BC034737.1	IOH22717	ligand of numb-protein X 1 (LNX1)	0	1
BC003383.1	IOH2969	transcription factor B2, mitochondrial (TFB2M)	0	1
BC024300.1	IOH12700	follistatin-like 4 (FSTL4)	0	1
NM_000450.1	IOH42039	selectin E (endothelial adhesion molecule 1) (SELE)	0	1
BC014140.2	IOH12771	Bardet-Biedl syndrome 2 (BBS2)	1	0
TRANSGLUTAMINASE		NA	0	1
BC032307.1	IOH21674	coiled-coil domain containing 123 (CCDC123)	1	1
NM_053280.3	IOH35372	outer dense fiber of sperm tails 3 (ODF3)	1	1
BC030245.1	IOH21531	transmembrane protein 63A (TMEM63A)	0	0
NM_181791.1	IOH34882	Probable G-protein coupled receptor 141	0	0
BC000583.1	IOH22887	Thimet oligopeptidase	1	0
BC014117.1	IOH22991	thromboxane A synthase 1 (platelet, cytochrome P450, family 5, subfamily A) (TBXAS1)	1	0
BC032325.1	IOH21628	thioredoxin domain containing 10 (TXNDC10)	1	0
BC040679.2	IOH28711	RAB15, member RAS onocogene family (RAB15)	1	0
NM_002530.1		NT-3 growth factor receptor	0	4
BC033711.1	IOH21762	ataxin 3 (ATXN3)	0	5
XM_378356.1	IOH43700	PREDICTED: Homo sapiens hypothetical protein LOC283400 (LOC283400)	0	3
BC017305.1	IOH12450	sirtuin (silent mating type information regulation 2 homolog) 7 (S. cerevisiae) (SIRT7)	0	3
BC008964.2	IOH56888	6-phosphofructokinase, liver type	2	5
NM_153344.1	IOH40885	chromosome 6 open reading frame 141 (C6orf141)	2	6
BC026955.1	IOH11904	Poly [ADP-ribose] polymerase 6	0	2
NM_005105.2	IOH10383	RNA binding motif protein 8A (RBM8A)	0	3
NM_005174.2	IOH45903	ATP synthase, H+ transporting, mitochondrial F1 complex, gamma polypeptide 1 (ATP5C1), nuclear gene encoding mitochondrial protein, transcript variant 2	0	3
BC028571.1	IOH62087	UDP-GalNAc:beta-1,3-N-acetylgalactosaminyltransferase 1	2	5
NM_024303.1	IOH5245	zinc finger and SCAN domain containing 5 (ZSCAN5)	1	2
BC009785.1	IOH14325	glycine-N-acyltransferase (GLYAT)	1	3
BC032400.1	IOH21693	chromosome 16 open reading frame 44 (C16orf44)	1	1
BC008730.2	IOH5942	hexokinase 1 (HK1)	0	2
NM_021198.1	IOH12189	CTD (carboxy-terminal domain, RNA polymerase II, polypeptide A) small phosphatase 1 (CTDSP1), transcript variant 1	2	4
NM_014570.2	IOH5693	ADP-ribosylation factor GTPase activating protein 3 (ARFGAP3)	0	3
NM_033666.1	IOH36761	integrin, beta 1 (fibronectin receptor, beta polypeptide, antigen CD29 includes MDF2, MSK12) (ITGB1), transcript variant 1B	0	2
NM_001002255.1	IOH50186	Small ubiquitin-related modifier 4	0	2
NM_173827.1	IOH44568	Mitochondrial inner membrane protein COX18	0	2
BC054517.1	IOH28882	Fanconi anemia, complementation group L (FANCL)	1	1
NM_017761.2	IOH4866	proline-rich nuclear receptor coactivator 2 (PNRC2)	0	1
NM_001646.1	IOH14363	apolipoprotein C-IV (APOC4)	0	1
XM_379657.2	IOH43323	PREDICTED: Homo sapiens hypothetical LOC401544 (LOC401544)	0	1
BC067423.1	IOH40158	UDP-GlcNAc:betaGal beta-1,3-N-acetylglucosaminyltransferase 3 (B3GNT3)	2	3
BC090049.1	IOH62587	Mesoderm-specific transcript homolog protein	0	1
PV4690		Glucocorticoid receptor	1	1
NM_004060.2	IOH4393	cyclin G1 (CCNG1), transcript variant 1	0	1
NM_004938.1		Death-associated protein kinase 1	0	5
XM_290936.2	IOH27440	Kinesin-like protein KIF26B	0	2
NM_003341.3	IOH43236	Ubiquitin-conjugating enzyme E2 E1	1	0
NM_000291.2	IOH42151	Phosphoglycerate kinase 1	1	1
BC042578.1	IOH27311	progastricsin (pepsinogen C) (PGC)	2	5
NM_001018.2	IOH1683	ribosomal protein S15 (RPS15)	1	1
NM_000284.1	IOH3633	pyruvate dehydrogenase (lipoamide) alpha 1 (PDHA1)	0	1
NM_152786.1	IOH11171	chromosome 9 open reading frame 43 (C9orf43)	2	3
BC039582.1	IOH26251	dynein, axonemal, intermediate chain 2 (DNAI2)	1	1
NM_024712.2	IOH22774	engulfment and cell motility 3 (ELMO3)	2	3
NM_145641.1	IOH44125	apolipoprotein L, 3 (APOL3), transcript variant beta/a	0	1
BC001380.2	IOH3984	succinate dehydrogenase complex, subunit A, flavoprotein (Fp) (SDHA)	0	1
NM_001482.1	IOH3911	glycine amidinotransferase (L-arginine:glycine amidinotransferase) (GATM), nuclear gene encoding mitochondrial protein	0	1
NM_014653.2	IOH44102	WSC domain containing 2 (WSCD2)	1	1
BC009423.1	IOH12920	suppressor of G2 allele of SKP1 pseudogene (S. cerevisiae) (SUGT1P)	0	1
BC027609.2	IOH11601	spermatid associated (SPERT)	2	4
NM_130390.1	IOH42237	tripartite motif-containing 34 (TRIM34), transcript variant 3	1	1
BC025276.1	IOH14043	U3 small nucleolar RNA-associated protein 18 homolog	2	1
NM_017609.2	IOH27480	chromosome 10 open reading frame 92 (C10orf92)	2	2
NM_000197.1	IOH21502	Testosterone 17-beta-dehydrogenase 3	1	3
NM_002154.3	IOH52882	Heat shock 70 kDa protein 4	0	3
BC021987.2	IOH27886	N-myc (and STAT) interactor (NMI)	1	0
BC029382.1	IOH23139	Angiogenic factor with G patch and FHA domains 1	0	3
BC002555.1	IOH4008	CDC-like kinase 3 (CLK3)	1	1
NM_017727.2	IOH4312	Transmembrane protein 214	0	1
NM_030773.1	IOH21834	tubulin, beta 1 (TUBB1)	0	1
NM_032625.1	IOH40804	chromosome 7 open reading frame 13 (C7orf13)	2	2
BC023973.1	IOH27304	immunoglobulin lambda variable 6-57 (IGLV6-57)	1	1
BC030210.1	IOH22603	CD79b molecule, immunoglobulin-associated beta (CD79B)	1	2
NM_000970.2	IOH1951	60S ribosomal protein L6	0	1
XM_170840.2	IOH43016	CMT1A duplicated region transcript 15 protein-like protein	0	1
BC058836.1	IOH29500	WD repeat domain 3 (WDR3)	1	2
BC062696.1	IOH40720	microsomal triglyceride transfer protein (MTTP)	0	2
BC019358.1	IOH14809	Protein tweety homolog 1	0	2
NM_001570.2		Interleukin-1 receptor-associated kinase-like 2	0	2
NM_004444.2		ephrin receptor B4 (EPHB4)	0	2
NM_020239.2	IOH21482	CDC42 small effector 1 (CDC42SE1), transcript variant 2	0	2
BC031052.1	IOH22518	TNF receptor-associated factor 6 (TRAF6)	2	2
BC040499.1	IOH27240	TGF-beta receptor type-2	2	2
XM_042301.6	IOH44804	Protein TET2	2	2
NM_203405.1	IOH39798	Keratin-associated protein 26-1	1	1
NM_032174.2	IOH13297	translocase of outer mitochondrial membrane 40 homolog (yeast)-like (TOMM40L)	1	1
BC033677.1	IOH40219	Uncharacterized protein C9orf114	0	1
BC059376.1	IOH29245	gamma-aminobutyric acid (GABA) A receptor, epsilon (GABRE)	0	1
NM_002876.2	IOH58772	DNA repair protein RAD51 homolog 3	0	1
BC000989.2	IOH2897	chromosome 14 open reading frame 124 (C14orf124)	1	0
NM_003697.1	IOH28188	olfactory receptor, family 5, subfamily F, member 1 (OR5F1)	1	0
BC006231.1	IOH6284	inhibitor of kappa light polypeptide gene enhancer in B-cells, kinase beta (IKBKB)	1	0
BC002955.1	IOH4931	ubiquitin specific peptidase 2 (USP2)	2	0
NM_000061.1	IOH39717	Bruton agammaglobulinemia tyrosine kinase (BTK)	2	0
BC009074.1	IOH3371	chromosome 8 open reading frame 70 (C8orf70)	0	4
NM_003192.1	IOH14757	tubulin folding cofactor C (TBCC)	3	6
BC007228.1	IOH6059	CSAG family, member 3A (CSAG3A)	2	5
BC003690.1	IOH3064	Importin-4	1	4
NM_004887.2	IOH5492	chemokine (C-X-C motif) ligand 14 (CXCL14)	1	5
NM_015509.2	IOH43513	NECAP endocytosis associated 1 (NECAP1)	0	4
NM_022572.1	IOH6351	paroxysmal nonkinesigenic dyskinesia (PNKD), transcript variant 2	3	5
NM_003720.1	IOH3819	Proteasome assembly chaperone 1	1	3
BC020838.1	IOH13454	claudin 20 (CLDN20)	1	5
NM_178152.1	IOH20954	Neuronal migration protein doublecortin	2	6
NM_145261.2	IOH9879	DnaJ (Hsp40) homolog, subfamily C, member 19 (DNAJC19)	1	4
BC009294.1	IOH14145	ribosomal protein L14 (RPL14)	0	2
BC012602.1	IOH14457	signaling lymphocytic activation molecule family member 1 (SLAMF1)	2	4
NM_001955.2	IOH9950	Endothelin-1	1	3
BC098112.1	IOH63324	Histone H2B type 1-N	0	2
BC063463.1	IOH39865	coenzyme Q3 homolog, methyltransferase (S. cerevisiae) (COQ3)	2	3
PV3617		neurotrophic tyrosine kinase, receptor, type 3 (NTRK3), transcript variant 3	1	3
NM_003509.2	IOH1642	histone cluster 1, H2ai (HIST1H2AI)	0	2
XM_373824.2	IOH43375	PREDICTED: Homo sapiens hypothetical LOC388589 (LOC388589)	2	7
NM_152706.2	IOH11478	hypothetical protein MGC26647 (MGC26647)	1	3
P2251		protein kinase C, beta 1 (PRKCB1), transcript variant 2	0	5
NM_031285.1	IOH22841	tetraspanin 9 (TSPAN9)	2	6
NM_001912.2	IOH53927	Cathepsin L1	1	2
NM_006575.2		Mitogen-activated protein kinase kinase kinase kinase 5	0	2
NM_006243.2	IOH54021	Serine/threonine-protein phosphatase 2A 56 kDa regulatory subunit alpha isoform	0	1
BC032522.1	IOH21949	mitochondrial ribosomal protein L47 (MRPL47)	1	1
BC012611.1	IOH13711	eukaryotic translation initiation factor 4E (EIF4E)	0	1
NM_003590.2	IOH26262	cullin 3 (CUL3)	1	2
NM_015926.2	IOH5918	testis expressed 264 (TEX264)	0	1
NM_007115.2	IOH22602	tumor necrosis factor, alpha-induced protein 6 (TNFAIP6)	2	2
BC017025.1	IOH9960	parathymosin (PTMS)	2	4
BC020739.1	IOH14471	interleukin 13 receptor, alpha 2 (IL13RA2)	1	1
NM_002365.3	IOH40373	Melanoma-associated antigen B3	0	2
NM_033481.2	IOH45897	F-box protein 9 (FBXO9), transcript variant 3	1	2
NM_138959.1	IOH39982	vang-like 1 (van gogh, Drosophila) (VANGL1)	3	6
BC035680.1	IOH26032	T cell receptor alpha joining 17 (TRAJ17)	0	1
BC053664.1	IOH28996	zinc finger, FYVE domain containing 28 (ZFYVE28)	1	1
BC001968.1		Cell division protein kinase 9	0	2
BC021120.1	IOH14846	RNA binding motif protein 4 (RBM4)	0	1
NM_015991.1	IOH23091	complement component 1, q subcomponent, A chain (C1QA)	1	2
NM_138448.2	IOH10544	acylphosphatase 2, muscle type (ACYP2)	0	1
NM_181655.1	IOH50196	UPF0450 protein C17orf58	1	0
BC010395.1	IOH13836	ATPase, H+ transporting, lysosomal accessory protein 2 (ATP6AP2)	1	1
NM_013338.2	IOH12723	asparagine-linked glycosylation 5 homolog (S. cerevisiae, dolichyl-phosphate beta-glucosyltransferase) (ALG5)	0	1
NM_152443.1	IOH10746	retinol dehydrogenase 12 (all-trans/9-cis/11-cis) (RDH12)	3	3
NM_001005753.1	IOH45855	vacuolar protein sorting 24 homolog (S. cerevisiae) (VPS24), transcript variant 2	1	5
NM_001004285.1	IOH45460	DNA fragmentation factor, 40kDa, beta polypeptide (caspase-activated DNase) (DFFB), transcript variant 3	1	1
BC001497.2	IOH12354	RAN binding protein 5 (RANBP5)	2	5
BC047476.1	IOH62399	N-terminal kinase-like-binding protein 1	0	1
BC051838.1	IOH27071	Rho guanine nucleotide exchange factor 16	0	0
BC066948.1	IOH61473	Ubiquitin-conjugating enzyme E2 S	3	5
NM_080670.2	IOH14509	solute carrier family 35, member A4 (SLC35A4)	0	1
NM_016071.2	IOH11088	mitochondrial ribosomal protein S33 (MRPS33), nuclear gene encoding mitochondrial protein, transcript variant 1	0	1
BC008788.2	IOH6237	chromosome 1 open reading frame 159 (C1orf159)	1	1
NM_182756.1	IOH26877	speedy homolog A (Drosophila) (SPDYA), transcript variant 2	1	0
BC005895.1	IOH7427	COX11 homolog, cytochrome c oxidase assembly protein (yeast) (COX11)	2	4
NM_004530.1	IOH4128	matrix metallopeptidase 2 (gelatinase A, 72kDa gelatinase, 72kDa type IV collagenase) (MMP2)	1	4
NM_152332.2	IOH27272	tandem C2 domains, nuclear (TC2N)	1	0
NM_002269.1	IOH26522	karyopherin alpha 5 (importin alpha 6) (KPNA5)	2	1
BC017717.1	IOH11300	deiodinase, iodothyronine, type III (DIO3)	1	0
NM_001015509.1	IOH54713	Peptidyl-tRNA hydrolase 2, mitochondrial	1	0
XM_115092.2	IOH28535	Olfactory receptor 56B4	1	0
NM_005565.2	IOH11014	lymphocyte cytosolic protein 2 (SH2 domain containing leukocyte protein of 76kDa) (LCP2)	0	4
NM_145234.1	IOH5714	chordin-like 1 (CHRDL1)	2	2
BC014539.1	IOH12145	secretogranin III (SCG3)	3	4
NM_021133.1		2-5A-dependent ribonuclease	0	3
NM_198563.1	IOH26582	transmembrane protein 110 (TMEM110)	3	4
NM_001124.1	IOH13846	adrenomedullin (ADM)	2	2
NM_180976.1	IOH43173	protein phosphatase 2, regulatory subunit B', delta isoform (PPP2R5D), transcript variant 2	0	3
NM_130469.1	IOH28073	jun dimerization protein 2 (JDP2)	1	1
NM_024062.2	IOH2945	vang-like 1 (van gogh, Drosophila) (VANGL1)	2	3
NM_006228.2	IOH22728	prepronociceptin (PNOC)	0	2
BC001487.2	IOH12155	TAR DNA-binding protein 43	1	2
NM_000148.2	IOH41006	fucosyltransferase 1 (galactoside 2-alpha-L-fucosyltransferase, H blood group) (FUT1)	2	1
NM_021165.1	IOH21556	family with sequence similarity 5, member B (FAM5B)	0	0
NM_016954.2	IOH46151	T-box 22 (TBX22), transcript variant 2	0	2
NM_002984.1	IOH29652	chemokine (C-C motif) ligand 4 (CCL4), transcript variant 1	2	3
BC015557.2	IOH14423	CD68 molecule (CD68)	0	2
NM_025099.1	IOH13233	chromosome 17 open reading frame 68 (C17orf68)	0	1
BC035404.2	IOH27426	PTK2 protein tyrosine kinase 2 (PTK2)	3	0
NM_022074.2	IOH38055	family with sequence similarity 111, member A (FAM111A), transcript variant 1	2	1
NM_006194.1	IOH4822	paired box 9 (PAX9)	1	1
BC013396.2	IOH60266	Titin	1	0
BC011418.1	IOH9706	retinol saturase (all-trans-retinol 13,14-reductase) (RETSAT)	1	1
XM_291438.1	IOH28505	olfactory receptor, family 2, subfamily W, member 3 (OR2W3)	2	2
NM_022829.4	IOH55518	Solute carrier family 13 member 3	0	1
BC001149.1	IOH4457	UTP14, U3 small nucleolar ribonucleoprotein, homolog A (yeast) (UTP14A)	1	2
NM_012092.1	IOH11466	inducible T-cell co-stimulator (ICOS)	1	2
NM_001010899.1	IOH57359	Putative uncharacterized protein C1orf120	0	1
BC096708.1	IOH63336	Wilms tumor-associated protein	0	1
NM_032037.2	IOH10991	testis-specific serine kinase 6 (TSSK6)	0	2
BC004902.1	IOH5223	Uncharacterized protein KIAA0947	2	2
NM_030588.1	IOH1868	ATP-dependent RNA helicase A	0	1
NM_006131.1	IOH36655	bone morphogenetic protein 1 (BMP1), transcript variant BMP1-5	0	1
NM_000208.1		Insulin receptor	0	1
NM_174909.1	IOH14735	transmembrane protein 167 (TMEM167)	1	2
NM_053278.1	IOH28355	trace amine associated receptor 8 (TAAR8)	1	2
BC009458.1	IOH13468	Homeobox protein BarH-like 1	0	1
BC035959.1	IOH27984	cytochrome P450, family 19, subfamily A, polypeptide 1 (CYP19A1)	1	1
NM_173565.1	IOH22306	Radial spoke head 10 homolog B2	0	1
NM_138807.1	IOH12627	chromosome 3 open reading frame 31 (C3orf31)	0	1
BC065290.1	IOH39961	cytochrome b reductase 1 (CYBRD1)	1	1
BC036092.1	IOH27277	MYC associated factor X (MAX)	0	1
BC015899.1	IOH10023	ATPase, H+ transporting V0 subunit e2, mRNA (cDNA clone MGC:17890 IMAGE:3908757), complete cds.	1	0
BC036651.2	IOH28634	PTK2B protein tyrosine kinase 2 beta (PTK2B)	1	0
NM_001432.1	IOH42289	Proepiregulin	1	0
NM_152653.1	IOH13176	ubiquitin-conjugating enzyme E2E 2 (UBC4/5 homolog, yeast) (UBE2E2)	3	6
NM_002618.2	IOH40689	peroxisome biogenesis factor 13 (PEX13)	1	6
BC022454.2	IOH10977	Transient receptor potential cation channel subfamily M member 3	2	5
NM_138779.1	IOH10711	chromosome 13 open reading frame 27 (C13orf27)	3	5
BC016745.2	IOH10673	capping protein (actin filament) muscle Z-line, alpha 3 (CAPZA3)	2	5
NM_145046.2	IOH10728	calreticulin 3 (CALR3)	0	4
BC000786.1	IOH40821	ADP-ribosylation factor GTPase activating protein 1 (ARFGAP1)	3	6
BC009350.1	IOH14087	Eukaryotic translation initiation factor 2-alpha kinase 4	1	3
NM_130389.2	IOH59768	Tripartite motif-containing protein 34	2	4
NM_002031.2	IOH56137	fyn-related kinase (FRK)	1	3
BC057787.1	IOH29198	Transmembrane protein 180	1	4
NM_003437.2	IOH6661	zinc finger protein 136 (ZNF136)	4	5
BC000980.1	IOH2952	interleukin 17 receptor B (IL17RB)	1	3
BC030696.1	IOH22243	gamma-aminobutyric acid (GABA) A receptor, alpha 1 (GABRA1)	0	3
BC093745.1	IOH61986	hypothetical LOC441178, mRNA (cDNA clone MGC:120780 IMAGE:7939590), complete cds	3	5
NM_138557.1	IOH42691	toll-like receptor 4 (TLR4), transcript variant 4	1	6
BC064943.1	IOH39950	LETM1 domain-containing protein 1	1	3
NM_001384.2	IOH5134	DPH2 homolog (S. cerevisiae) (DPH2), transcript variant 1	3	5
BC006354.1	IOH6429	Coenzyme A synthase (COASY)	2	4
NM_000978.2	IOH13951	ribosomal protein L23 (RPL23)	3	4
NM_016091.1	IOH4743	eukaryotic translation initiation factor 3, subunit E interacting protein (EIF3EIP)	1	3
NM_018841.3	IOH57343	Guanine nucleotide-binding protein G(I)/G(S)/G(O) subunit gamma-12	1	2
BC001083.1	IOH3776	Protein MYLE	3	4
NM_015975.3	IOH14186	TAF9B RNA polymerase II, TATA box binding protein (TBP)-associated factor, 31kDa (TAF9B)	4	5
BC053985.1	IOH29363	CD244 molecule, natural killer cell receptor 2B4 (CD244)	2	1
NM_003887.1	IOH60033	Development and differentiation-enhancing factor 2	0	1
NM_014060.1	IOH4208	malignant T cell amplified sequence 1 (MCTS1)	0	1
XM_372356.1	IOH28338	olfactory receptor, family 51, subfamily I, member 1 (OR51I1)	1	2
BC001553.1	IOH10899	chromatin modifying protein 2B (CHMP2B)	1	1
BC059358.1	IOH29286	RAB3A interacting protein (rabin3) (RAB3IP)	1	1
BC001956.1	IOH4856	folliculin interacting protein 1 (FNIP1)	2	1
NM_024625.3	IOH26215	zinc finger CCCH-type, antiviral 1 (ZC3HAV1), transcript variant 2	2	2
NM_004952.3	IOH11980	ephrin-A3 (EFNA3)	3	2
NM_058199.1	IOH4375	olfactomedin 1 (OLFM1), transcript variant 3	2	5
BC068530.1	IOH40123	Transportin-3	4	5
BC016486.2	IOH61399	lectin, galactoside-binding, soluble, 8 (galectin 8) (LGALS8)	0	4
BC002940.1	IOH5740	Zinc finger protein ZXDC	4	4
NM_006871.1	IOH21066	Receptor-interacting serine/threonine-protein kinase 3	3	4
NM_178134.2	IOH35875	cytochrome P450, family 4, subfamily Z, polypeptide 1 (CYP4Z1)	0	1
BC068070.1	IOH40777	mitochondrial ribosomal protein L52 (MRPL52)	4	4
BC041409.2	IOH28728	basic helix-loop-helix domain containing, class B, 9 (BHLHB9)	1	1
XM_096472.2	IOH42996	hypothetical LOC143678 (LOC143678)	2	1
NM_173622.2	IOH40872	CMT1A duplicated region transcript 4 (CDRT4)	3	1
NM_017863.2	IOH45788	chromosome X open reading frame 48 (CXorf48), transcript variant 2	0	4
BC036242.1	IOH27520	copine III (CPNE3)	0	4
NM_198708.1	IOH43331	Hydroxysteroid 11-beta-dehydrogenase 1-like protein	2	1
BC096184.3	IOH63211	Myeloblastin	3	5
BC060793.1	IOH29233	potassium channel, subfamily K, member 5 (KCNK5)	0	3
BC028725.2	IOH11761	ELMO/CED-12 domain containing 1 (ELMOD1)	1	1
NM_019613.2	IOH6706	WDR45-like (WDR45L)	0	2
BC060879.1	IOH29289	chromosome 7 open reading frame 31 (C7orf31)	2	1
BC032663.1	IOH21987	phorbol-12-myristate-13-acetate-induced protein 1 (PMAIP1)	2	4
BC013162.1	IOH10924	selenoprotein K (SELK)	2	0
BC012172.1	IOH13314	Acetyl-coenzyme A synthetase, cytoplasmic	1	3
BC068594.1	IOH40084	chromosome 1 open reading frame 213 (C1orf213)	0	2
BC038422.1	IOH27448	zinc finger protein 533 (ZNF533)	3	1
BC007206.1	IOH6600	Src homology 2 domain containing transforming protein D (SHD)	1	3
PV5273		phosphoinositide-3-kinase, catalytic, delta polypeptide and phosphoinositide-3-kinase, regulatory subunit 1 (alpha): PIK3CD and PIK3R1 sequences are seperated by -- (in the protein list file).	0	3
BC032576.1	IOH61732	Cell division cycle-associated 7-like protein	1	3
BC021121.1	IOH23113	WNK lysine deficient protein kinase 1 (WNK1)	4	4
BC046567.1	IOH26099	Sugar phosphate exchanger 3	4	4
NM_145212.1	IOH13804	mitochondrial ribosomal protein L30 (MRPL30), nuclear gene encoding mitochondrial protein, transcript variant 1	0	1
NM_015568.2	IOH37988	protein phosphatase 1, regulatory (inhibitor) subunit 16B (PPP1R16B)	4	2
NM_032047.2	IOH27467	UDP-GlcNAc:betaGal beta-1,3-N-acetylglucosaminyltransferase 5 (B3GNT5)	0	1
BC037957.1	IOH28753	Intermediate filament tail domain-containing protein 1	3	3
NM_000455.3		serine/threonine kinase 11 (STK11)	0	2
NM_024821.1	IOH10944	coiled-coil domain containing 134 (CCDC134)	0	1
NM_003633.1	IOH3669	ectodermal-neural cortex (with BTB-like domain) (ENC1)	1	0
BC014959.1	IOH13467	RING1 and YY1 binding protein (RYBP)	0	2
NM_153339.1	IOH22364	pseudouridylate synthase-like 1 (PUSL1)	3	0
NM_004666.1	IOH37862	vanin 1 (VNN1)	3	1
BC011804.2	IOH14438	chromosome 1 open reading frame 165 (C1orf165)	1	1
BC020257.1	IOH23119	neurofibromin 2 (bilateral acoustic neuroma) (NF2)	0	1
BC022189.2	IOH22420	chromosome 17 open reading frame 47 (C17orf47)	4	0
BC004190.1	IOH3910	calcium binding atopy-related autoantigen 1 (CBARA1)	4	1
La/SS-B Antigen		NA	0	1
BC067826.1	IOH61627	mortality factor 4 like 1, mRNA (cDNA clone MGC:87361 IMAGE:4824022), complete cds	0	1
NM_004907.2	IOH3842	immediate early response 2 (IER2)	2	1
BC062625.1	IOH39875	solute carrier family 39 (zinc transporter), member 4 (SLC39A4)	3	1
NM_020424.2	IOH10391	LYR motif containing 1 (LYRM1)	1	0
BC003398.1	IOH3008	MOB1, Mps One Binder kinase activator-like 1B (yeast) (MOBK1B)	2	0
BC037773.1	IOH25827	Probable histone acetyltransferase MYST1	1	0
NM_032883.1	IOH6975	TOX high mobility group box family member 2 (TOX2), transcript variant 3	5	8
BC044884.1	IOH26494	KIAA0265 protein (KIAA0265)	2	7
NM_004178.3	IOH45867	TAR (HIV-1) RNA binding protein 2 (TARBP2), transcript variant 3	3	5
NM_012148.1	IOH39321	double homeobox, 3 (DUX3)	3	6
BC040527.1	IOH27478	coiled-coil domain containing 100 (CCDC100)	1	5
NM_177405.1	IOH40959	cat eye syndrome chromosome region, candidate 1 (CECR1), transcript variant 2	2	5
NM_152757.1	IOH43336	Putative uncharacterized protein C20orf200	3	6
BC007526.1	IOH6827	chromosome X open reading frame 34 (CXorf34)	2	6
BC062354.1	IOH40674	mannosyl (alpha-1,6-)-glycoprotein beta-1,6-N-acetyl-glucosaminyltransferase, isozyme B (MGAT5B)	3	5
BC098149.1	IOH63298	Variable charge X-linked protein 3	3	5
NM_175040.1	IOH45799	ST6 (alpha-N-acetyl-neuraminyl-2,3-beta-galactosyl-1,3)-N-acetylgalactosaminide alpha-2,6-sialyltransferase 4 (ST6GALNAC4), transcript variant 2	2	5
NM_170746.2	IOH58679	Selenoprotein H	3	5
BC056160.1	IOH29049	solute carrier family 25 (mitochondrial carrier; adenine nucleotide translocator), member 5 (SLC25A5)	3	5
NM_014508.2	IOH54737	apolipoprotein B mRNA editing enzyme, catalytic polypeptide-like 3C (APOBEC3C), mRNA.	3	5
NM_013332.1	IOH4831	hypoxia-inducible protein 2 (HIG2), transcript variant 1	2	5
BC000767.1	IOH3816	THAP domain containing 4 (THAP4)	2	4
NM_024025.1	IOH21299	dual specificity phosphatase 26 (putative) (DUSP26)	3	5
NM_024594.1	IOH10705	pantothenate kinase 3 (PANK3)	2	5
NM_172208.1	IOH59271	Tapasin	2	5
NM_033103.1	IOH22340	rhophilin, Rho GTPase binding protein 2 (RHPN2)	4	6
NM_145044.1	IOH10819	zinc finger protein 501 (ZNF501)	3	3
XM_378449.1	IOH42926	PREDICTED: Homo sapiens hypothetical LOC400201 (LOC400201)	4	6
NM_000638.2	IOH6660	vitronectin (VTN)	4	5
NM_005750.2	IOH34751	chromosome 4 open reading frame 6 (C4orf6)	3	4
BC025281.1	IOH14071	RNA binding motif protein 9 (RBM9)	3	4
NM_033177.2	IOH6217	HLA-B associated transcript 4 (BAT4)	2	3
BC005155.1	IOH5175	Rho guanine nucleotide exchange factor 1	1	3
BC047575.1	IOH26425	dishevelled associated activator of morphogenesis 2 (DAAM2)	3	4
BC060818.1	IOH29248	synaptosomal-associated protein, 91kDa homolog (mouse) (SNAP91)	3	3
NM_016050.1	IOH4903	mitochondrial ribosomal protein L11 (MRPL11), nuclear gene encoding mitochondrial protein, transcript variant 1	1	2
NM_004912.3	IOH38232	KRIT1, ankyrin repeat containing (KRIT1), transcript variant 2	1	1
BC061514.1	IOH29303	MPV17 mitochondrial membrane protein-like (MPV17L)	5	5
NM_024314.1	IOH5409	hypothetical protein MGC4294 (MGC4294)	2	2
BC028719.1	IOH11625	transmembrane phosphatase with tensin homology (TPTE)	1	1
NM_015959.1	IOH4346	Thioredoxin domain-containing protein 14	2	5
NM_002011.2		Fibroblast growth factor receptor 4	2	5
NM_001017926.1	IOH55729	Zinc fingers and homeoboxes protein 1	0	3
NM_144664.3	IOH45592	Protein FAM76B	0	3
BC035282.1	IOH28668	carbohydrate (N-acetylglucosamine 6-O) sulfotransferase 4 (CHST4)	2	1
NM_031440.1	IOH35320	receptor (chemosensory) transporter protein 3 (RTP3)	4	5
BC020792.1	IOH14086	homogentisate 1,2-dioxygenase (homogentisate oxidase) (HGD)	1	0
BC008344.1	IOH6969	serine/threonine kinase 40 (STK40)	3	5
BC018426.1	IOH9673	Protein URG4	2	4
BC052806.1	IOH28971	mitochondrial ribosomal protein L55 (MRPL55)	3	2
NM_004214.3	IOH2103	fibroblast growth factor (acidic) intracellular binding protein (FIBP), transcript variant 2	4	1
NM_003869.4	IOH41749	Carboxylesterase 2	4	5
NM_002755.2		mitogen-activated protein kinase kinase 1 (MAP2K1); see catalog number for detailed information on wild-type or point mutant status	2	1
NM_017542.3	IOH43680	pogo transposable element with KRAB domain (POGK)	3	5
BC002758.1	IOH5367	adenosine deaminase, tRNA-specific 1 (ADAT1)	1	0
NM_177553.1	IOH27961	growth arrest-specific 2 (GAS2), transcript variant 2	2	4
BC013781.1	IOH9733	tubulin, gamma complex associated protein 3 (TUBGCP3)	2	1
NM_181578.1	IOH45838	replication factor C (activator 1) 5, 36.5kDa (RFC5), transcript variant 2	3	0
NM_018719.2	IOH26280	cell division cycle associated 7-like (CDCA7L)	1	2
BC012485.1	IOH10861	major histocompatibility complex, class I-related (MR1)	3	1
BC039904.1	IOH28768	histone deacetylase 4 (HDAC4)	2	3
NM_144736.3	IOH40597	Protein midA homolog, mitochondrial	1	2
NM_001830.2	IOH38268	chloride channel 4 (CLCN4)	4	1
BC041876.1	IOH27738	tau tubulin kinase 2 (TTBK2)	0	1
RNP_COMPLEX		NA	1	1
PV4130		PDZ binding kinase (PBK)	3	3
BC060770.1	IOH29229	Sushi domain-containing protein 1	3	1
BC001277.1	IOH3254	KDEL (Lys-Asp-Glu-Leu) endoplasmic reticulum protein retention receptor 3 (KDELR3)	0	0
NM_201263.1	IOH43175	tryptophanyl tRNA synthetase 2, mitochondrial (WARS2), nuclear gene encoding mitochondrial protein, transcript variant 2	3	1
NM_173065.1	IOH40989	interleukin 28 receptor, alpha (interferon, lambda receptor) (IL28RA), transcript variant 3	2	0
NM_013443.2	IOH6716	Alpha-N-acetylgalactosaminide alpha-2,6-sialyltransferase 6	5	9
PV3788		mitogen-activated protein kinase kinase kinase 11 (MAP3K11)	2	7
NM_014358.1	IOH4717	C-type lectin domain family 4, member E (CLEC4E)	3	7
NM_018454.4	IOH3087	nucleolar and spindle associated protein 1 (NUSAP1), transcript variant 2	3	7
BC014969.1	IOH12203	activating transcription factor 6 (ATF6)	2	6
NM_175571.2	IOH44212	GTPase, IMAP family member 8 (GIMAP8)	2	5
NM_031954.2	IOH25947	potassium channel tetramerisation domain containing 10 (KCTD10)	2	5
NM_014370.2	IOH60262	SFRS protein kinase 3 (SRPK3)	3	5
BC032422.1	IOH21726	killer cell immunoglobulin-like receptor, two domains, long cytoplasmic tail, 3 (KIR2DL3)	3	5
BC005395.1	IOH7260	hemopexin (HPX)	2	5
BC029891.1	IOH22824	transcription factor EC (TFEC)	4	5
NM_002730.1		protein kinase, cAMP-dependent, catalytic, alpha (PRKACA), transcript variant 1	3	5
NM_022470.1	IOH5710	Zinc finger matrin-type protein 3	4	7
NM_004545.3	IOH43540	NADH dehydrogenase (ubiquinone) 1 beta subcomplex, 1, 7kDa (NDUFB1)	4	5
NM_001013705.1	IOH54674	hypothetical LOC440337, mRNA (cDNA clone MGC:163229 IMAGE:40146388), complete cds	3	5
BC001230.1	IOH3145	anterior pharynx defective 1 homolog A (C. elegans) (APH1A)	3	4
NM_002576.2		Serine/threonine-protein kinase PAK 1	2	4
NM_032169.2	IOH10227	Acyl-CoA dehydrogenase family member 11	0	5
BC009106.1	IOH10263	SEC16 homolog B (S. cerevisiae) (LZTR2)	4	5
NM_004235.1	IOH22853	Kruppel-like factor 4 (gut) (KLF4)	1	5
BC030570.1	IOH21961	ADP-ribosylation factor-like 17 (ARL17)	4	4
BC002369.1		Serine/threonine-protein kinase PLK1	2	3
NM_030770.1	IOH39634	transmembrane protease, serine 5 (spinesin) (TMPRSS5)	2	3
BC012621.1	IOH12318	killer cell lectin-like receptor subfamily G, member 1 (KLRG1)	0	3
NM_005733.1	IOH13299	kinesin family member 20A (KIF20A)	4	4
NM_005724.3	IOH10272	tetraspanin 3 (TSPAN3), transcript variant 1	3	3
BC032246.1	IOH21524	zinc finger protein 44 (ZNF44)	2	2
PV3967		fms-related tyrosine kinase 3 (FLT3); see catalog number for detailed information on wild-type or point mutant status	4	7
BC095401.1	IOH62645	AKT-interacting protein	2	5
NM_032786.1	IOH13275	zinc finger CCCH-type containing 10 (ZC3H10)	0	3
NM_018638.4	IOH60258	Ethanolamine kinase 1	2	5
NM_175634.1	IOH42249	Protein CBFA2T1	0	4
NM_005738.1	IOH5077	ADP-ribosylation factor-like 4A (ARL4A), transcript variant 1	2	5
NM_134323.1	IOH6090	TAR (HIV-1) RNA binding protein 2 (TARBP2), transcript variant 1	4	2
NM_018114.4	IOH45463	DALR anticodon-binding domain-containing protein 3	1	2
NM_001008270.1	IOH59742	Peptidase S1 domain-containing protein LOC136242	5	5
BC008037.2	IOH5889	protein kinase C and casein kinase substrate in neurons 2 (PACSIN2)	2	3
BC060850.1	IOH39820	Solute carrier family 46 member 3	1	2
BC021174.1	IOH10706	Small EDRK-rich factor 1	4	5
NM_003006.2	IOH22638	selectin P ligand (SELPLG)	0	2
NM_001003683.1	IOH52231	phosphodiesterase 1A, calmodulin-dependent (PDE1A), transcript variant 2, mRNA.	0	2
NM_177973.1	IOH22150	sulfotransferase family, cytosolic, 2B, member 1 (SULT2B1), transcript variant 2	2	5
BC022347.1	IOH13990	lactotransferrin (LTF)	1	1
NM_001937.3	IOH53854	Dermatopontin	0	1
NM_004441.3	IOH39415	Ephrin receptor B1 (EPHB1)	0	1
BC007557.1	IOH6840	F-box/LRR-repeat protein 20	1	1
NM_001211.3		Mitotic checkpoint serine/threonine-protein kinase BUB1 beta	1	2
NM_145702.1	IOH40861	tigger transposable element derived 1 (TIGD1)	3	0
NM_001722.2	IOH4103	polymerase (RNA) III (DNA directed) polypeptide D, 44kDa (POLR3D)	1	2
NM_001001953.1	IOH28551	olfactory receptor, family 10, subfamily G, member 9 (OR10G9)	0	1
NM_000359.1	IOH22155	transglutaminase 1 (K polypeptide epidermal type I, protein-glutamine-gamma-glutamyltransferase) (TGM1)	0	2
NM_001008726.1	IOH9771	WD repeat domain 89 (WDR89), transcript variant 1	4	1
NM_016298.1	IOH38196	F-box protein 40 (FBXO40)	0	1
NM_005522.3	IOH21992	homeobox A1 (HOXA1), transcript variant 1	3	0
NM_021038.3	IOH26398	muscleblind-like (Drosophila) (MBNL1), transcript variant 1	1	0
NM_144608.1	IOH14178	hexamthylene bis-acetamide inducible 2 (HEXIM2)	4	0
BC011952.1	IOH10475	family with sequence similarity 18, member B2 (FAM18B2)	4	2
NM_000499.2	IOH10675	cytochrome P450, family 1, subfamily A, polypeptide 1 (CYP1A1)	1	0
NM_001003937.1	IOH40055	Testis-specific Y-encoded-like protein 6	2	2
18S + 28S Ribosomal RNA		NA	0	1
NM_002210.2	IOH38619	integrin, alpha V (vitronectin receptor, alpha polypeptide, antigen CD51) (ITGAV)	1	2
NM_004734.1		doublecortin-like kinase 1 (DCLK1)	2	3
BC099907.1	IOH62625	General transcription factor II-I	1	0
NM_006449.2	IOH12552	CDC42 effector protein (Rho GTPase binding) 3 (CDC42EP3)	3	0
NM_022154.2	IOH12587	Zinc transporter ZIP8	0	0
NM_003004.1	IOH1886	secreted and transmembrane 1 (SECTM1)	4	0
BC035364.1	IOH28677	FYVE, RhoGEF and PH domain containing 5 (FGD5)	3	8
BC033621.2	IOH21688	Pseudouridylate synthase 7 homolog-like protein	4	8
BC032852.2	IOH27153	melanoma antigen family B, 4 (MAGEB4)	3	6
NM_020676.2	IOH3846	abhydrolase domain containing 6 (ABHD6)	3	6
NM_022063.1	IOH27864	chromosome 10 open reading frame 84 (C10orf84)	5	5
BC069363.1	IOH40229	distal-less homeobox 6 (DLX6)	4	5
BC001946.1	IOH46145	bruno-like 4, RNA binding protein (Drosophila) (BRUNOL4)	6	7
NM_003868.1	IOH42157	fibroblast growth factor 16 (FGF16)	5	5
NM_006072.4	IOH40395	chemokine (C-C motif) ligand 26 (CCL26)	5	5
NM_138779.2	IOH45970	chromosome 13 open reading frame 27 (C13orf27)	4	5
NM_182487.1	IOH28960	olfactomedin-like 2A (OLFML2A)	5	5
NM_024540.2	IOH14529	mitochondrial ribosomal protein L24 (MRPL24), nuclear gene encoding mitochondrial protein, transcript variant 2	5	5
BC047722.1	IOH26651	hypothetical protein MGC52110 (MGC52110)	3	2
NM_024009.1	IOH11015	gap junction protein, beta 3, 31kDa (GJB3), transcript variant 1	1	3
NM_144675.1	IOH11144	GSG1-like (GSG1L), transcript variant 2, mRNA.	4	2
BC003408.2	IOH3031	melanoma antigen family A, 12 (MAGEA12)	3	5
NM_002742.1		Serine/threonine-protein kinase D1	1	3
BC047030.1	IOH26622	uridine phosphorylase 1 (UPP1)	4	5
BC015600.1	IOH12286	Sulfatase-modifying factor 2	1	2
PV3869		v-kit Hardy-Zuckerman 4 feline sarcoma viral oncogene homolog (KIT), transcript variant 1; see catalog number for detailed information on wild-type or point mutant status	4	5
BC001755.1	IOH4451	Leiomodin-1	4	2
BC066876.1	IOH40157	UDP-GlcNAc:betaGal beta-1,3-N-acetylglucosaminyltransferase 3 (B3GNT3)	3	3
BC008771.1		Serine/threonine-protein kinase MARK2	1	2
NM_033256.1	IOH13214	protein phosphatase 1, regulatory (inhibitor) subunit 14A (PPP1R14A)	5	5
SMITH (Sm) Antigen		NA	1	2
BC015883.1	IOH10061	tubulin, alpha 1b (TUBA1B)	1	0
NM_138280.1	IOH22167	citrate lyase beta like (CLYBL), transcript variant 1	1	1
BC032656.1	IOH21979	transcription factor 7-like 2 (T-cell specific, HMG-box) (TCF7L2)	1	0
NM_172028.1	IOH42497	ankyrin repeat and BTB (POZ) domain containing 1 (ABTB1), transcript variant 3	3	2
NM_182801.1	IOH23237	EGF-like, fibronectin type III and laminin G domains (EGFLAM), transcript variant 4	1	0
NM_032054.1	IOH36169	protocadherin gamma subfamily A, 5 (PCDHGA5), transcript variant 2	3	2
XM_370653.2	IOH26103	Coiled-coil domain-containing protein KIAA1826	2	0
NM_021912.2	IOH43073	gamma-aminobutyric acid (GABA) A receptor, beta 3 (GABRB3), transcript variant 2	1	2
NM_052819.1	IOH3124	caspase recruitment domain family, member 14 (CARD14), transcript variant 2	6	9
NM_024114.1	IOH5233	tripartite motif-containing 48 (TRIM48)	4	6
BC020577.1	IOH21439	carbonic anhydrase X (CA10)	5	6
PV3504		TANK-binding kinase 1 (TBK1)	5	6
PV3819		ret proto-oncogene (RET), transcript variant 4	5	4
NM_138738.1	IOH35375	Fc receptor-like 2 (FCRL2), transcript variant 1	2	5
PV3791		Serine/threonine-protein kinase D1	5	5
NM_005641.2	IOH11381	TAF6 RNA polymerase II, TATA box binding protein (TBP)-associated factor, 80kDa (TAF6), transcript variant 1	2	6
BC042608.1	IOH27462	family with sequence similarity 90, member A1 (FAM90A1)	5	5
BC012899.1	IOH11155	sialidase 4 (NEU4)	3	5
NM_006799.2	IOH45736	protease, serine, 21 (testisin) (PRSS21), transcript variant 1	7	5
BC021187.1	IOH10893	DKFZP434K028 protein (DKFZP434K028)	3	6
NM_015584.2	IOH4335	polymerase (DNA-directed), delta interacting protein 2 (POLDIP2)	2	5
NM_173642.1	IOH26158	family with sequence similarity 80, member A (FAM80A)	3	5
BC002650.1	IOH5270	KIAA1622 (KIAA1622)	2	3
XM_209196.3	IOH43609	PREDICTED: Homo sapiens similar to HSPC323 (LOC284422)	3	5
NM_177398.1	IOH34878	LIM homeobox transcription factor 1, alpha (LMX1A), transcript variant 1	2	3
BC002877.2	IOH5717	Metallophosphoesterase 1	2	2
BC040301.1	IOH27655	PAS domain containing 1 (PASD1)	2	3
BC039318.1	IOH40224	baculoviral IAP repeat-containing 8 (BIRC8)	2	2
BC071702.1	IOH61790	Deleted in bladder cancer protein 1	2	1
PV3872		epidermal growth factor receptor (erythroblastic leukemia viral (v-erb-b) oncogene homolog, avian) (EGFR); see catalog number for detailed information on wild-type or point mutant status	2	2
NM_153694.3	IOH40756	synaptonemal complex protein 3 (SYCP3)	2	2
NM_203454.1	IOH10788	Putative C->U-editing enzyme APOBEC-4	2	1
NM_001011538.1	IOH39826	similar to 60S ribosomal protein L21 (LOC402176)	4	2
BC015219.1	IOH21424	RanBP-type and C3HC4-type zinc finger-containing protein 1	3	3
NM_020445.1	IOH3354	ARP3 actin-related protein 3 homolog B (yeast) (ACTR3B), transcript variant 1	2	0
XM_379510.1	IOH44484	PREDICTED: Homo sapiens hypothetical protein FLJ34048 (FLJ34048)	6	3
BC014441.1	IOH13328	NOL1/NOP2/Sun domain family, member 4 (NSUN4)	4	1
BC018137.1	IOH10369	TATA box binding protein (TBP)-associated factor, RNA polymerase I, B, 63kDa (TAF1B)	5	1
BC000238.1	IOH4394	ankyrin repeat and zinc finger domain containing 1 (ANKZF1)	5	10
BC003193.1	IOH4578	leucine rich repeat containing 1 (LRRC1)	6	8
NM_152634.1	IOH21490	TFS2-M domain-containing protein 1 (MGC17403)	7	7
BC004564.2	IOH46115	docking protein 3 (DOK3)	3	6
BC011234.1	IOH10261	survival motor neuron domain containing 1 (SMNDC1)	5	4
NM_006110.1	IOH3469	CD2 (cytoplasmic tail) binding protein 2 (CD2BP2)	3	5
PV3622		testis-specific serine kinase 2 (TSSK2)	3	5
BC056257.1	IOH29441	adaptor-related protein complex 3, mu 2 subunit (AP3M2)	3	4
NM_002462.2	IOH21990	myxovirus (influenza virus) resistance 1, interferon-inducible protein p78 (mouse) (MX1)	3	4
NM_153224.2	IOH22434	hypothetical protein MGC34034 (MGC34034)	6	1
BC056887.1	IOH29097	chromosome 5 open reading frame 5 (C5orf5)	4	2
NM_015640.1	IOH22934	SERPINE1 mRNA binding protein 1 (SERBP1), transcript variant 4	6	6
BC056147.1	IOH29115	F-box protein 38 (FBXO38)	7	6
NM_002045.1	IOH6708	growth associated protein 43 (GAP43)	4	6
BC018292.1	IOH10299	torsin family 3, member A (TOR3A)	4	5
BC013178.1	IOH10945	splicing factor, arginine/serine-rich 16 (SFRS16)	7	2
NM_181892.1	IOH43701	ubiquitin-conjugating enzyme E2D 3 (UBC4/5 homolog, yeast) (UBE2D3), transcript variant 8	4	2
NM_173799.2	IOH42215	V-set and transmembrane domain containing 3 (VSTM3)	4	4
NM_006792.2	IOH58223	mortality factor 4 (MORF4), mRNA.	4	3
BC004106.1	IOH5672	mediator complex subunit 6 (MED6)	7	0
NM_004283.2	IOH10511	Ras-related protein Rab-3D	5	3
NM_005663.2	IOH46152	Wolf-Hirschhorn syndrome candidate 2 (WHSC2)	5	1
NM_005828.1	IOH3135	WD repeat domain 68 (WDR68)	8	4
XM_374177.2	IOH43615	PREDICTED: Homo sapiens hypothetical LOC389415 (LOC389415)	5	4
BC007566.1	IOH6849	mannose-6-phosphate receptor binding protein 1 (M6PRBP1)	5	4
NM_177435.1	IOH5357	peroxisome proliferative activated receptor, delta (PPARD), transcript variant 2	6	3
NM_021640.2	IOH28884	chromosome 12 open reading frame 10 (C12orf10)	6	3
BC019337.1	IOH12297	immunoglobulin heavy constant gamma 1 (G1m marker) (IGHG1)	9	6
NM_024779.2	IOH11402	phosphatidylinositol-5-phosphate 4-kinase, type II, gamma (PIP4K2C)	8	3
BC029427.1	IOH23192	coiled-coil domain containing 23 (CCDC23)	9	3
BC024229.1	IOH13485	prostaglandin E receptor 3 (subtype EP3) (PTGER3)	0	4
BC001247.1	IOH3075	LIM domain and actin-binding protein 1	0	3
PV3323		ribosomal protein S6 kinase, 90kDa, polypeptide 3 (RPS6KA3)	0	3
NM_001543.3	IOH52925	Bifunctional heparan sulfate N-deacetylase/N-sulfotransferase 1	0	3
BC043175.1	IOH25844	Cyclin-J	0	4
NM_022915.2	IOH13325	mitochondrial ribosomal protein L44 (MRPL44), nuclear gene encoding mitochondrial protein	0	3
NM_014836.3	IOH27118	Rho-related BTB domain containing 1 (RHOBTB1), transcript variant 1	0	1
NM_020992.2	IOH2948	PDZ and LIM domain 1 (elfin) (PDLIM1)	0	2
NM_016152.2	IOH36705	retinoic acid receptor, beta (RARB), transcript variant 2	0	2
PV3317		MAP kinase-activated protein kinase 2	0	2
NM_170678.1	IOH35216	integrin beta 1 binding protein 3 (ITGB1BP3)	0	1
NM_181526.1	IOH5278	myosin, light chain 9, regulatory (MYL9), transcript variant 2, mRNA.	0	1
PHG0276		Recombinant Human Fibroblast Growth Factor 8b (rhFGF-8b)	0	2
BC064367.1	IOH39904	ankyrin repeat and sterile alpha motif domain containing 6 (ANKS6)	0	3
NM_000590.1	IOH40159	interleukin 9 (IL9)	0	1
BC028212.1	IOH28685	phosphoinositide-3-kinase, regulatory subunit 5, p101 (PIK3R5)	0	2
NM_058244.1	IOH35591	wingless-type MMTV integration site family, member 8A (WNT8A)	0	0
NM_001621.2	IOH36592	aryl hydrocarbon receptor (AHR)	0	1
NM_021945.4	IOH57770	chromosome 6 open reading frame 85 (C6orf85)	0	1
BC009712.1	IOH9914	ATP-binding cassette, sub-family D (ALD), member 3 (PMP70)	0	1
BC007639.1	IOH6968	ATG4 autophagy related 4 homolog D (S. cerevisiae) (ATG4D)	0	1
BC014891.1	IOH10029	KIAA0701 protein (KIAA0701)	0	1
BC045667.1	IOH25877	sorting nexin 13 (SNX13)	0	0
NM_145071.1	IOH22653	cytokine inducible SH2-containing protein (CISH)	0	1
NM_015937.1	IOH10124	phosphatidylinositol glycan anchor biosynthesis, class T (PIGT)	0	1
NM_001001436.1	IOH29491	UPF0547 protein C16orf87	0	1
BC038406.1	IOH27357	Uncharacterized protein C3orf20	0	1
BC064547.1	IOH39921	ADAM metallopeptidase domain 2 (fertilin beta) (ADAM2)	0	1
NM_139313.1	IOH6704	YME1-like 1 (S. cerevisiae) (YME1L1), nuclear gene encoding mitochondrial protein, transcript variant 2	0	1
NM_001759.2	IOH13739	cyclin D2 (CCND2)	0	0
NM_004367.3	IOH26031	C-C chemokine receptor type 6	0	0
NM_032345.1	IOH6625	within bgcn homolog (Drosophila) (WIBG)	0	3
NM_032091.1	IOH36195	protocadherin gamma subfamily A, 11 (PCDHGA11), transcript variant 2	0	3
NM_018401.1		Serine/threonine-protein kinase 32B	0	2
BC041366.2	IOH27747	ubiquitin specific peptidase 2 (USP2)	1	4
BC052988.1	IOH28908	retinoic acid induced 14 (RAI14)	0	1
PV3882		sterile alpha motif and leucine zipper containing kinase AZK (ZAK), transcript variant 1	0	2
BC035572.1	IOH27588	ecotropic viral integration site 2A (EVI2A)	0	1
NM_005506.1	IOH9776	scavenger receptor class B, member 2 (SCARB2)	1	3
NM_014089.2	IOH4601	nucleoporin like 1 (NUPL1), transcript variant 1	1	4
BC050424.1	IOH26735	F-box protein 38 (FBXO38)	0	2
BC053670.1	IOH29013	carboxylesterase 3 (brain) (CES3)	0	2
NM_006258.1		cGMP-dependent protein kinase 1, beta isozyme	0	2
NM_006854.2	IOH5849	KDEL (Lys-Asp-Glu-Leu) endoplasmic reticulum protein retention receptor 2 (KDELR2), transcript variant 1	0	3
NM_021633.2	IOH6063	kelch-like 12 (Drosophila) (KLHL12)	0	2
BC008253.1	IOH3366	chromosome 8 open reading frame 43 (C8orf43)	0	1
NM_003440.2	IOH27715	Zinc finger protein 140	0	2
BC040553.1	IOH27521	coiled-coil domain containing 60 (CCDC60)	1	3
NM_006232.2	IOH4626	polymerase (RNA) II (DNA directed) polypeptide H (POLR2H)	1	2
NM_020369.1	IOH27571	fascin homolog 3, actin-bundling protein, testicular (Strongylocentrotus purpuratus) (FSCN3)	0	1
BC101006.1	IOH63457	ANKRD26-like family B member 1	0	2
PV3144		neurotrophic tyrosine kinase, receptor, type 1 (NTRK1), transcript variant 3	1	2
NM_178122.2	IOH26674	chromosome 1 open reading frame 201 (C1orf201)	1	3
BC028206.1	IOH11618	killer cell immunoglobulin-like receptor, three domains, long cytoplasmic tail, 1 (KIR3DL1)	1	0
NM_006609.2		Mitogen-activated protein kinase kinase kinase 2	1	0
BC033871.1	IOH21866	tripartite motif-containing 74 (TRIM74)	0	2
BC067257.1	IOH39993	alkB, alkylation repair homolog 3 (E. coli) (ALKBH3)	0	1
NM_020548.4	IOH39853	diazepam binding inhibitor (GABA receptor modulator, acyl-Coenzyme A binding protein) (DBI), transcript variant 1	1	1
NM_052926.1	IOH35779	Paraneoplastic antigen-like protein 5	0	3
NM_005375.2	IOH39964	v-myb myeloblastosis viral oncogene homolog (avian) (MYB)	0	1
BC021560.1	IOH14110	deleted in bladder cancer 1 (DBC1)	1	0
BC000014.1	IOH4700	Prenylcysteine oxidase-like	0	1
NM_030755.1	IOH22397	thioredoxin domain containing 1 (TXNDC1)	1	2
BC037207.1	IOH27659	KIAA1600 (KIAA1600)	1	1
PV3620		mitogen-activated protein kinase 9 (MAPK9), transcript variant JNK2-a2	0	3
NM_000014.3	IOH26170	alpha-2-macroglobulin (A2M)	1	1
NM_000126.1	IOH10424	Electron transfer flavoprotein subunit alpha, mitochondrial	1	2
BC039172.1	IOH25808	calmodulin-like 5 (CALML5)	1	3
BC010047.1	IOH14429	E3 SUMO-protein ligase PIAS4	0	2
NM_033102.1	IOH26726	solute carrier family 45, member 3 (SLC45A3)	0	1
BC020713.1	IOH12329	serpin peptidase inhibitor, clade B (ovalbumin), member 5 (SERPINB5)	1	1
NM_001011669.1	IOH57339	Coiled-coil-helix-coiled-coil-helix domain-containing protein 7	1	0
PV3848		v-raf murine sarcoma viral oncogene homolog B1 (BRAF); see catalog number for detailed information on wild-type or point mutant status	0	2
BC000567.2	IOH4178	seizure related 6 homolog (mouse)-like 2 (SEZ6L2)	1	0
NM_020468.2	IOH45873	sorting nexin 14 (SNX14), transcript variant 2	1	1
NM_003605.3	IOH42213	O-linked N-acetylglucosamine (GlcNAc) transferase (UDP-N-acetylglucosamine:polypeptide-N-acetylglucosaminyl transferase) (OGT), transcript variant 3, mRNA.	1	0
BC047741.1	IOH26659	spinster homolog 1 (Drosophila) (SPNS1)	1	0
NM_182556.1	IOH25901	solute carrier family 25, member 45 (SLC25A45), transcript variant 1	0	0
BC007224.1	IOH6896	Polypeptide N-acetylgalactosaminyltransferase 10	0	1
NM_003115.2	IOH13054	UDP-N-acteylglucosamine pyrophosphorylase 1 (UAP1)	1	2
NM_012131.1	IOH35308	Claudin-17	0	1
NM_014407.3	IOH34780	Calcium-activated potassium channel subunit beta-3	1	0
NM_003244.1	IOH3086	TGFB-induced factor homeobox 1 (TGIF1), transcript variant 4	0	1
BC070055.1	IOH40142	Guanylate-binding protein 4	1	0
BC040630.1	IOH28784	aquaporin 8 (AQP8)	0	1
BC030602.2	IOH22288	myosin ID (MYO1D)	1	0
NM_005723.2	IOH9899	tetraspanin 5 (TSPAN5)	1	0
PV4212		p21(CDKN1A)-activated kinase 4 (PAK4), transcript variant 2	0	1
BC051291.1	IOH29356	retinol dehydrogenase 11 (all-trans/9-cis/11-cis) (RDH11)	0	1
BC029869.1	IOH22797	ectonucleoside triphosphate diphosphohydrolase 3 (ENTPD3)	0	1
NM_001814.1	IOH29634	cathepsin C (CTSC), transcript variant 1	0	1
BC020517.1	IOH10694	sideroflexin 1 (SFXN1)	0	1
NM_181493.1	IOH44551	Inosine triphosphate pyrophosphatase	0	1
BC041945.1	IOH25891	solute carrier family 27 (fatty acid transporter), member 6 (SLC27A6)	0	1
BC013768.1	IOH11543	propionyl Coenzyme A carboxylase, beta polypeptide (PCCB)	1	1
NM_024514.4	IOH41000	cytochrome P450, family 2, subfamily R, polypeptide 1 (CYP2R1)	1	1
NM_139248.1	IOH39947	lipase, member H (LIPH)	1	1
NM_153031.1	IOH40991	hypothetical protein LOC150538 (FLJ32063)	0	0
BC047621.1	IOH28808	nicastrin (NCSTN)	0	0
NM_145313.1	IOH10825	Ras-GEF domain-containing family member 1A	1	0
BC039576.1	IOH28775	Abhydrolase domain-containing protein 1	0	0
NM_030631.1	IOH42454	Mitochondrial 2-oxodicarboxylate carrier	0	0
BC036492.2	IOH22068	Formin-like protein 2	1	0
BC070374.1	IOH62870	Serum paraoxonase/lactonase 3	1	0
NM_004070.2	IOH26573	chloride channel Ka (CLCNKA), transcript variant 1	1	0
NM_014044.4	IOH11358	Protein unc-50 homolog	1	0
NM_177996.1	IOH14498	erythrocyte membrane protein band 4.1-like 1 (EPB41L1), transcript variant 2	1	0
BC015816.2	IOH46175	microtubule associated serine/threonine kinase 2 (MAST2)	1	5
BC000633.1		Dual specificity protein kinase TTK	0	4
BC059363.1	IOH29178	Alpha-N-acetylgalactosaminide alpha-2,6-sialyltransferase 3	0	2
NM_172240.1	IOH10829	WD repeat domain 51B (WDR51B)	1	4
BC046129.1	IOH26911	UDP-N-acetyl-alpha-D-galactosamine:polypeptide N-acetylgalactosaminyltransferase 7 (GalNAc-T7) (GALNT7)	1	2
PV3354		feline sarcoma oncogene (FES)	2	5
PV4649		Dual specificity tyrosine-phosphorylation-regulated kinase 1B	0	3
NM_030948.1	IOH43117	phosphatase and actin regulator 1 (PHACTR1)	1	5
NM_001757.1	IOH3944	carbonyl reductase 1 (CBR1)	1	2
BC009313.1	IOH14080	cDNA clone MGC:16614 IMAGE:4111344, complete cds	1	2
NM_006349.2	IOH27942	zinc finger, HIT type 1 (ZNHIT1)	0	1
AB065755.1	IOH28258	olfactory receptor, family 10, subfamily G, member 8 (OR10G8), mRNA	0	3
NM_001746.2	IOH4977	calnexin (CANX), transcript variant 1	0	1
BC062313.1	IOH40672	myelin transcription factor 1 (MYT1)	2	5
NM_004813.1	IOH5041	peroxisomal biogenesis factor 16 (PEX16), transcript variant 1	2	4
NM_152305.1	IOH26599	KTEL (Lys-Tyr-Glu-Leu) containing 1 (KTELC1)	0	2
NM_000415.1	IOH43658	islet amyloid polypeptide (IAPP)	1	3
XM_294794.1	IOH42923	PREDICTED: Homo sapiens similar to putative membrane-bound dipeptidase 2 (LOC339065)	1	2
NM_004964.2	IOH3443	histone deacetylase 1 (HDAC1)	2	4
NM_020958.2	IOH44465	Serine/threonine-protein phosphatase 4 regulatory subunit 4	2	4
NM_012113.1	IOH27401	carbonic anhydrase XIV (CA14)	0	2
BC007920.1	IOH6782	major histocompatibility complex, class II, DR beta 1 (HLA-DRB1)	0	0
NM_001025239.1	IOH58999	Tetraspanin-4	0	1
NM_003821.2	IOH6368	receptor-interacting serine-threonine kinase 2 (RIPK2)	0	0
BC035972.1	IOH27964	glypican 3 (GPC3)	2	3
NM_178232.2	IOH40677	hyaluronan and proteoglycan link protein 3 (HAPLN3)	0	2
BC057759.1	IOH29260	Ras-GEF domain-containing family member 1C	1	1
BC029428.1	IOH23124	Spermatogenesis-associated protein 4	0	2
NM_000199.2	IOH26596	N-sulfoglucosamine sulfohydrolase (sulfamidase) (SGSH)	0	1
BC025697.1	IOH11332	transcription factor 21 (TCF21)	0	1
PV4395		Serine/threonine-protein kinase MARK1	1	0
NM_002558.2	IOH26134	purinergic receptor P2X, ligand-gated ion channel, 1 (P2RX1)	2	2
NM_016503.2	IOH42176	39S ribosomal protein L30, mitochondrial	1	2
BC020569.1	IOH10736	exportin, tRNA (nuclear export receptor for tRNAs) (XPOT)	1	2
BC041793.1	IOH27245	kelch domain containing 3 (KLHDC3)	1	2
NM_014220.2	IOH59024	Transmembrane 4 L6 family member 1	1	1
NM_003073.1	IOH29630	SWI/SNF related, matrix associated, actin dependent regulator of chromatin, subfamily b, member 1 (SMARCB1), transcript variant 1	2	2
PV3361		adrenergic, beta, receptor kinase 1 (ADRBK1)	1	2
NM_138278.1	IOH11810	BCL2/adenovirus E1B 19kD interacting protein like (BNIPL)	1	4
BC002559.1	IOH4053	YTH domain family, member 2 (YTHDF2)	0	4
NM_002750.2		mitogen-activated protein kinase 8 (MAPK8), transcript variant JNK1-a1	0	4
NM_021219.2	IOH12137	junctional adhesion molecule 2 (JAM2)	1	0
NM_000023.1	IOH10645	sarcoglycan, alpha (50kDa dystrophin-associated glycoprotein) (SGCA)	1	1
BC028241.1	IOH21566	solute carrier family 41, member 3 (SLC41A3)	0	3
NM_153043.3	IOH40012	hypothetical protein FLJ37078 (FLJ37078)	1	1
NM_173501.1	IOH11653	Uncharacterized protein C16orf52	0	2
NM_000528.2	IOH4607	mannosidase, alpha, class 2B, member 1 (MAN2B1)	1	0
NM_033064.1	IOH11249	ataxia, cerebellar, Cayman type (caytaxin) (ATCAY)	0	3
NM_003684.2	IOH5352	MAP kinase interacting serine/threonine kinase 1 (MKNK1), transcript variant 1	0	3
NM_001008485.1	IOH3341	solute carrier family 41, member 3 (SLC41A3), transcript variant 1	1	1
BC019292.1	IOH13802	1-acylglycerol-3-phosphate O-acyltransferase 2 (lysophosphatidic acid acyltransferase, beta) (AGPAT2)	1	3
NM_032882.1	IOH6958	paraneoplastic antigen like 6A (PNMA6A)	2	1
NM_000181.1	IOH29680	glucuronidase, beta (GUSB)	1	3
NM_016946.3	IOH12781	F11 receptor (F11R), transcript variant 1	0	1
BC032008.1	IOH22169	mitochondrial ribosomal protein L50 (MRPL50)	1	3
BC069412.1	IOH40305	Elastase-2B	1	0
BC065534.1	IOH39945	ATG9 autophagy related 9 homolog A (S. cerevisiae) (ATG9A)	2	2
BC009779.1	IOH12227	outer dense fiber of sperm tails 2-like (ODF2L)	0	3
NM_000142.2		fibroblast growth factor receptor 3 (achondroplasia, thanatophoric dwarfism) (FGFR3), transcript variant 1	1	3
BC057219.1	IOH29425	pyrophosphatase (inorganic) 2 (PPA2)	0	2
NM_198949.1	IOH40684	nudix (nucleoside diphosphate linked moiety X)-type motif 1 (NUDT1), transcript variant 2B	2	0
BC035973.1	IOH27968	solute carrier family 22 (organic cation transporter), member 13 (SLC22A13)	1	0
BC013945.1	IOH13217	UDP-N-acetyl-alpha-D-galactosamine:polypeptide N-acetylgalactosaminyltransferase 12 (GalNAc-T12) (GALNT12)	1	0
BC056398.1	IOH28786	adaptor-related protein complex 3, mu 2 subunit (AP3M2)	0	2
XM_373573.2	IOH44770	PREDICTED: Homo sapiens hypothetical LOC387942 (LOC387942)	1	2
NM_001218.2	IOH14010	carbonic anhydrase XII (CA12), transcript variant 1	1	2
BC007835.1	IOH6703	Serine/threonine-protein kinase 40	1	2
BC063114.1	IOH40733	Asporin	0	1
NM_001425.1	IOH9872	epithelial membrane protein 3 (EMP3)	0	2
NM_002741.1		Serine/threonine-protein kinase N1	0	2
BC015207.1	IOH11738	ARP3 actin-related protein 3 homolog B (yeast) (ACTR3B)	1	0
NM_032406.1	IOH42583	protocadherin gamma subfamily C, 4 (PCDHGC4), transcript variant 2	0	2
NM_080612.1	IOH42263	GRB2-associated binding protein 3 (GAB3), transcript variant 2	1	0
BC012536.1	IOH14192	hydroxysteroid (17-beta) dehydrogenase 12 (HSD17B12)	1	1
BC011460.1	IOH9675	chitinase 3-like 2 (CHI3L2)	0	0
NM_006886.2	IOH3903	ATP synthase, H+ transporting, mitochondrial F1 complex, epsilon subunit (ATP5E), nuclear gene encoding mitochondrial protein	0	1
NM_144624.1	IOH14193	kinase interacting with leukemia-associated gene (stathmin) (KIS)	2	1
BC012377.1	IOH10489	EGF-like-domain, multiple 7 (EGFL7)	1	1
BC096336.1	IOH63244	Insulin-degrading enzyme	0	1
BC005922.1	IOH7526	islet cell autoantigen 1, 69kDa (ICA1)	0	1
NM_017868.2	IOH21721	tetratricopeptide repeat domain 12 (TTC12)	1	1
BC028351.1	IOH11753	Hydrocephalus-inducing protein homolog	0	1
XM_290842.3	IOH42563	Leucine-rich repeat and fibronectin type III domain-containing protein 1	0	0
NM_006183.2	IOH13686	neurotensin (NTS)	1	1
BC032249.1	IOH21538	immunoglobulin heavy constant alpha 1 (IGHA1)	1	1
BC028124.1	IOH11563	chromosome 17 open reading frame 46 (C17orf46)	0	1
NM_182943.2	IOH41898	Procollagen-lysine,2-oxoglutarate 5-dioxygenase 2	0	1
NM_145303.1	IOH13071	similar to RIKEN cDNA 2310008M10 (LOC202459)	1	0
NM_148910.1	IOH42286	Toll/interleukin-1 receptor domain-containing adapter protein	1	0
NM_016641.2	IOH14021	membrane interacting protein of RGS16 (MIR16)	1	0
NM_012320.3	IOH39852	1-O-acylceramide synthase	1	0
BC026241.1	IOH12763	ubiquitin protein ligase E3C (UBE3C)	1	0
BC006155.1	IOH6598	adaptor-related protein complex 2, alpha 2 subunit (AP2A2)	1	0
NM_001002256.1	IOH41094	ATP synthase lipid-binding protein, mitochondrial	1	0
BC019861.1	IOH11354	UDP glucuronosyltransferase 1 family, polypeptide A6 (UGT1A6)	0	0
NM_001190.2	IOH4883	branched chain aminotransferase 2, mitochondrial (BCAT2)	1	0
PHC0205		interleukin 20 (IL20)	0	0
BC033708.1	IOH21753	Ral GEF with PH domain and SH3 binding motif 1 (RALGPS1)	0	5
NM_199190.1	IOH42760	La ribonucleoprotein domain family, member 4 (LARP4), transcript variant 3	3	7
BC020229.1	IOH13350	arylsulfatase D (ARSD)	1	5
NM_024958.1	IOH3105	neurensin 2 (NRSN2)	1	4
BC011926.1	IOH27855	KIAA0141 (KIAA0141)	2	4
NM_004882.3	IOH26927	CBF1-interacting corepressor	1	4
NM_033293.1	IOH40681	caspase 1, apoptosis-related cysteine peptidase (interleukin 1, beta, convertase) (CASP1), transcript variant gamma	0	3
BC026070.2	IOH11290	tubby like protein 2 (TULP2)	1	4
BC031520.1	IOH22122	MLF1 interacting protein (MLF1IP)	2	4
NM_004409.1		Myotonin-protein kinase	0	2
PV4402		cyclin C and cyclin-dependent kinase 8 (CDK6): cyclin C and CDK8 sequences are seperated by -- (in the protein list file).	1	3
NM_018571.4		amyotrophic lateral sclerosis 2 (juvenile) chromosome region, candidate 2 (ALS2CR2)	0	2
NM_021010.1	IOH40358	Defensin-5	1	3
XM_379306.1	IOH43607	PREDICTED: Homo sapiens hypothetical LOC401169 (LOC401169)	2	7
BC011676.1	IOH13772	NF-kappa-B inhibitor epsilon	1	3
NM_052822.1	IOH12952	secretory carrier membrane protein 1 (SCAMP1), transcript variant 2	2	5
BC001259.1	IOH3096	adaptor-related protein complex 4, sigma 1 subunit (AP4S1)	0	1
NM_003782.3	IOH21916	UDP-Gal:betaGlcNAc beta 1,3-galactosyltransferase, polypeptide 4 (B3GALT4)	1	2
NM_182492.1	IOH43816	low density lipoprotein receptor-related protein 5-like (LRP5L)	0	2
BC031412.1	IOH22687	hyaluronan binding protein 2 (HABP2)	1	2
BC011379.1	IOH9728	Uncharacterized protein C15orf39	1	3
NM_006201.2		Serine/threonine-protein kinase PCTAIRE-3	0	1
XM_379667.1	IOH43133	PREDICTED: Homo sapiens chromosome 9 open reading frame 148 (C9orf148)	2	2
BC025767.1	IOH11434	Rhophilin-1	3	4
NM_016013.2	IOH4599	NADH dehydrogenase (ubiquinone) 1 alpha subcomplex, assembly factor 1 (NDUFAF1)	1	1
BC008708.1	IOH6868	hydroxysteroid (17-beta) dehydrogenase 10 (HSD17B10)	1	2
NM_153289.2	IOH40759	defensin, beta 119 (DEFB119), transcript variant 1	2	4
BC022465.1	IOH11206	Lipid phosphate phosphatase-related protein type 1	1	1
BC008808.2	IOH6341	excision repair cross-complementing rodent repair deficiency, complementation group 6-like (ERCC6L)	3	4
NM_004836.2		Eukaryotic translation initiation factor 2-alpha kinase 3	0	2
BC008840.2	IOH46146	Thrombospondin type-1 domain-containing protein 4	2	4
BC054508.1	IOH28891	erythrocyte membrane protein band 4.1 like 5 (EPB41L5)	3	6
NM_014899.2	IOH25836	Rho-related BTB domain containing 3 (RHOBTB3)	1	1
NM_001004708.1	IOH28245	olfactory receptor, family 4, subfamily D, member 6 (OR4D6)	3	4
BC028424.1	IOH11463	E3 ubiquitin-protein ligase rififylin	1	1
NM_005776.2	IOH41416	cornichon homolog (Drosophila) (CNIH)	1	0
NM_000167.1	IOH27543	glycerol kinase (GK), transcript variant 2	3	4
BC051835.1	IOH27073	mannosyl (alpha-1,3-)-glycoprotein beta-1,4-N-acetylglucosaminyltransferase, isozyme B (MGAT4B)	3	4
BC019247.1	IOH11023	sperm associated antigen 8 (SPAG8)	1	2
BC043581.1	IOH26300	keratin 36 (KRT36)	3	3
NM_021639.2	IOH10045	GC-rich promoter binding protein 1-like 1 (GPBP1L1)	2	1
NM_016127.4	IOH10022	transmembrane protein 66 (TMEM66)	1	2
NM_005666.1	IOH13657	complement factor H-related 2 (CFHR2)	3	4
NM_014773.2	IOH6737	KIAA0141 (KIAA0141)	3	4
BC032998.2	IOH22277	MANSC domain containing 1 (MANSC1)	2	3
NM_032499.1	IOH6336	chromosome 15 open reading frame 41 (C15orf41)	2	4
BC031630.1	IOH22761	endoplasmic reticulum metallopeptidase 1 (ERMP1)	2	3
BC027731.1	IOH14616	mitochondrial translational release factor 1 (MTRF1)	1	0
NM_202467.1	IOH45902	GIPC PDZ domain containing family, member 1 (GIPC1), transcript variant 2	0	3
NM_001448.2	IOH25750	glypican 4 (GPC4)	1	0
NM_138785.1	IOH12456	chromosome 6 open reading frame 72 (C6orf72)	2	4
BC030585.2	IOH22261	sperm associated antigen 6 (SPAG6)	1	0
NM_016512.2	IOH58592	Sperm-associated antigen 11B	1	0
NM_144599.1	IOH10826	Non-imprinted in Prader-Willi/Angelman syndrome region protein 1 homolog	2	2
NM_001696.2	IOH5034	ATPase, H+ transporting, lysosomal 31kDa, V1 subunit E1 (ATP6V1E1), transcript variant 1	1	0
BC071844.1	IOH63093	Claudin-7	1	0
NM_001011667.1	IOH57352	Coiled-coil-helix-coiled-coil-helix domain-containing protein 7	1	0
NM_002307.1	IOH40009	lectin, galactoside-binding, soluble, 7 (galectin 7) (LGALS7)	2	2
BC007213.1	IOH6811	zinc finger, DHHC-type containing 6 (ZDHHC6)	2	4
NM_032826.3	IOH7455	UDP-xylose and UDP-N-acetylglucosamine transporter	1	0
NM_013319.1	IOH5671	UbiA prenyltransferase domain containing 1 (UBIAD1)	1	0
BC096303.1	IOH63248	Ribosomal protein S6 kinase alpha-3	2	0
NM_021735.1	IOH29577	chloride channel 6 (CLCN6), transcript variant ClC-6b	1	0
XM_098030.3	IOH41314	PREDICTED: Homo sapiens hypothetical LOC151261 (LOC151261)	1	1
BC056870.1	IOH29112	voltage-dependent anion channel 3 (VDAC3)	2	4
PV3248		casein kinase 2, alpha 1 polypeptide (CSNK2A1), transcript variant 2	3	3
BC018756.1	IOH13443	monooxygenase, DBH-like 1 (MOXD1)	2	4
BC074956.2	IOH61932	Interferon alpha-14	1	0
NM_031206.2	IOH14284	LAS1-like (S. cerevisiae) (LAS1L)	1	3
BC001743.1	IOH4884	cDNA clone IMAGE:3537461, **** WARNING: chimeric clone ****	2	3
NM_006404.3	IOH53863	Endothelial protein C receptor	1	0
NM_147204.1	IOH39618	transient receptor potential cation channel, subfamily V, member 4 (TRPV4), transcript variant 2	1	3
NM_019010.1	IOH22697	keratin 20 (KRT20)	2	3
NM_002401.2		Mitogen-activated protein kinase kinase kinase 3	3	1
NM_001306.2	IOH13619	claudin 3 (CLDN3)	1	0
BC043528.1	IOH26294	Glycosyltransferase 1 domain-containing protein 1	1	0
PV3501		polo-like kinase 1 (Drosophila) (PLK1)	2	3
NM_000562.1	IOH44369	complement component 8, alpha polypeptide (C8A)	2	1
NM_194279.1	IOH27677	iron-sulfur cluster assembly 2 homolog (S. cerevisiae) (ISCA2)	1	0
NM_003847.1	IOH9834	peroxisomal biogenesis factor 11A (PEX11A)	1	2
NM_018032.2	IOH4849	LUC7-like (S. cerevisiae) (LUC7L), transcript variant 1	2	1
NM_000121.2	IOH29824	erythropoietin receptor (EPOR)	2	3
ssDNA		NA	1	3
NM_004333.1		v-raf murine sarcoma viral oncogene homolog B1 (BRAF); see catalog number for detailed information on wild-type or point mutant status	0	3
NM_172213.1	IOH35341	CD8b molecule (CD8B), transcript variant 2	1	1
NM_014314.3	IOH52971	Probable ATP-dependent RNA helicase DDX58	0	1
NM_152315.1	IOH22681	Protein FAM55A	0	1
BC036107.1	IOH27227	heat shock 70kDa protein 2 (HSPA2)	1	1
BC003366.1	IOH2912	calcium regulated heat stable protein 1, 24kDa (CARHSP1)	1	1
BC067435.1	IOH62535	Cytochrome P450 2E1	0	1
BC058862.1	IOH28675	testis-specific kinase substrate (TSKS)	1	2
BC025279.1	IOH14049	Scaffold attachment factor B2	0	1
BC018113.1	IOH11302	ubiquitin specific peptidase 3 (USP3)	0	1
NM_003874.1	IOH11227	SLAM family member 5	3	0
NM_006899.2	IOH4853	isocitrate dehydrogenase 3 (NAD+) beta (IDH3B), nuclear gene encoding mitochondrial protein, transcript variant 1	1	1
NM_002788.1	IOH26156	proteasome (prosome, macropain) subunit, alpha type, 3 (PSMA3), transcript variant 1	2	1
BC100765.2	IOH63417	Xg blood group, mRNA (cDNA clone MGC:118759 IMAGE:40000158), complete cds	0	1
BC051768.1	IOH26676	patatin-like phospholipase domain containing 6 (PNPLA6)	2	1
NM_138288.1	IOH13958	chromosome 14 open reading frame 147 (C14orf147)	1	0
BC033752.1	IOH21873	cytochrome P450, family 20, subfamily A, polypeptide 1 (CYP20A1)	1	0
NM_182838.1	IOH43111	Solute carrier family 35 member E2	1	0
BC093068.1	IOH63191	Elongation factor Ts, mitochondrial	1	0
BC018435.1	IOH22140	damage-regulated autophagy modulator (DRAM)	2	0
NM_004892.2	IOH3957	Vesicle-trafficking protein SEC22b	1	0
NM_178498.2	IOH26576	solute carrier family 5 (sodium/glucose cotransporter), member 12, mRNA (cDNA clone MGC:52019 IMAGE:5188979), complete cds	1	0
PV3826		CDC-like kinase 3 (CLK3), transcript variant phclk3/152	2	0
PV3829		SFRS protein kinase 2 (SRPK2), transcript variant 2	3	7
NM_181738.1	IOH39994	peroxiredoxin 2 (PRDX2), nuclear gene encoding mitochondrial protein, transcript variant 3	3	6
NM_002421.2	IOH59103	Interstitial collagenase	2	5
BC032348.1	IOH21706	kelch-like 6 (Drosophila) (KLHL6)	2	5
BC017236.1	IOH14401	Casein kinase I isoform gamma-1	1	5
NM_021014.2	IOH43685	synovial sarcoma, X breakpoint 3 (SSX3), transcript variant 1	2	4
BC053647.1	IOH28956	FERM domain-containing protein 5	2	4
BC019342.2	IOH13149	tetraspanin 18 (TSPAN18)	2	6
NM_004466.3	IOH26127	glypican 5 (GPC5)	3	5
NM_001935.2	IOH12261	dipeptidyl-peptidase 4 (CD26, adenosine deaminase complexing protein 2) (DPP4)	1	4
NM_183243.1	IOH40877	IMP (inosine monophosphate) dehydrogenase 1 (IMPDH1), transcript variant 2	2	5
BC038960.1	IOH26165	Probable E3 ubiquitin-protein ligase HERC3	1	3
NM_015407.3	IOH4118	abhydrolase domain containing 14A (ABHD14A)	2	4
BC027866.1	IOH12025	ST8 alpha-N-acetyl-neuraminide alpha-2,8-sialyltransferase 4 (ST8SIA4)	3	4
NM_013367.2	IOH54154	Anaphase-promoting complex subunit 4	1	2
NM_001895.1		casein kinase 2, alpha 1 polypeptide (CSNK2A1), transcript variant 2	2	2
NM_006279.2	IOH26679	ST3 beta-galactoside alpha-2,3-sialyltransferase 3 (ST3GAL3), transcript variant 10	4	5
NM_014049.3	IOH6788	acyl-Coenzyme A dehydrogenase family, member 9 (ACAD9)	4	5
NM_002750.2		mitogen-activated protein kinase 8 (MAPK8), transcript variant JNK1-a1	0	2
NM_004541.2	IOH4389	NADH dehydrogenase (ubiquinone) 1 alpha subcomplex, 1, 7.5kDa (NDUFA1), nuclear gene encoding mitochondrial protein	2	3
BC001946.1	IOH3720	bruno-like 4, RNA binding protein (Drosophila) (BRUNOL4)	3	5
NM_015214.1	IOH41859	Phospholipase DDHD2	4	5
BC022341.1	IOH14769	Probable arginyl-tRNA synthetase, mitochondrial	2	6
NM_020170.3	IOH46155	nicalin homolog (zebrafish) (NCLN)	2	4
NM_002044.1	IOH4633	galactokinase 2 (GALK2), transcript variant 1	1	2
NM_001006634.1	IOH44197	Rho GTPase activating protein 17 (ARHGAP17), transcript variant 1	1	7
NM_174925.1	IOH43618	hypothetical protein LOC205251 (LOC205251)	2	2
BC004518.1	IOH5678	Synaptotagmin-17	1	1
NM_014774.1	IOH4054	KIAA0494 (KIAA0494)	1	1
BC006199.1	IOH5745	Cytosol aminopeptidase	1	1
NM_024966.2	IOH35829	sema domain, transmembrane domain (TM), and cytoplasmic domain, (semaphorin) 6D (SEMA6D), transcript variant 6	1	1
NM_005627.1		serum/glucocorticoid regulated kinase (SGK)	1	2
NM_018276.2	IOH43518	Protein phosphatase Slingshot homolog 3	2	2
BC063110.1	IOH40721	interleukin 17 receptor E (IL17RE)	4	4
BC024939.1	IOH21470	ganglioside-induced differentiation-associated protein 1 (GDAP1)	0	4
NM_152501.2	IOH12742	pyrin and HIN domain family, member 1 (PYHIN1), transcript variant a1	2	3
BC040693.1	IOH26345	CD53 molecule (CD53)	2	3
PV3620		mitogen-activated protein kinase 9 (MAPK9), transcript variant JNK2-a2	1	6
BC045546.1	IOH26768	glutamate receptor, ionotrophic, AMPA 4 (GRIA4)	2	2
NM_173802.2	IOH26328	hypothetical protein MGC50559 (MGC50559)	2	5
BC028601.2	IOH11626	solute carrier family 4, anion exchanger, member 2 (erythrocyte membrane protein band 3-like 1) (SLC4A2)	1	1
NM_002170.2	IOH35228	interferon, alpha 8 (IFNA8)	2	1
NM_005727.2	IOH6907	tetraspanin 1 (TSPAN1)	3	5
BC023556.2	IOH27845	vaccinia related kinase 3 (VRK3)	1	0
NM_001183.3	IOH4722	ATPase, H+ transporting, lysosomal accessory protein 1 (ATP6AP1)	0	3
NM_172037.2	IOH39980	Retinol dehydrogenase 10	2	0
NM_173459.1	IOH41470	interleukin 1 receptor-like 1 (IL1RL1), transcript variant 3	4	3
NM_017952.4	IOH40917	Pentatricopeptide repeat domain 3 (PTCD3)	1	0
BC028178.1	IOH11545	Collagen alpha-1(III) chain	1	4
BC008094.1	IOH3305	retinal G protein coupled receptor (RGR)	1	0
NM_182553.1	IOH26395	cornichon homolog 2 (Drosophila) (CNIH2)	1	0
PV3502		p21(CDKN1A)-activated kinase 6 (PAK6)	1	1
BC024269.1	IOH13934	major histocompatibility complex, class II, DR beta 1 (HLA-DRB1)	2	5
NM_024307.1	IOH45847	glycerophosphodiester phosphodiesterase domain containing 3 (GDPD3)	1	0
BC034145.1	IOH23165	transmembrane 4 L six family member 1 (TM4SF1)	2	0
NM_003674.1		Cell division protein kinase 10	1	0
NM_001307.1	IOH4602	claudin 7 (CLDN7)	2	4
BC003088.1	IOH4847	Ras-related GTP binding D (RRAGD)	4	4
NM_018447.1	IOH13963	transmembrane protein 111 (TMEM111)	2	1
NM_173074.1	IOH11654	phosphatidylinositol glycan anchor biosynthesis, class F (PIGF), transcript variant 2	2	0
NM_016430.2	IOH44539	Phosphatidylinositol N-acetylglucosaminyltransferase subunit P	2	0
NM_152474.2	IOH25857	chromosome 19 open reading frame 18 (C19orf18)	2	1
BC016327.1	IOH13232	nucleoporin 62kDa C-terminal like (NUP62CL)	2	0
BC065912.1	IOH40442	Tyrosine-protein kinase ABL2	0	3
NM_024099.2	IOH40910	Uncharacterized protein C11orf48	4	2
PV4653		NIMA (never in mitosis gene a)- related kinase 9	1	3
NM_144988.2	IOH12542	asparagine-linked glycosylation 14 homolog (S. cerevisiae) (ALG14)	3	4
NM_057157.1	IOH41398	cytochrome P450, family 26, subfamily A, polypeptide 1 (CYP26A1), transcript variant 2	1	0
NM_002949.2	IOH56891	39S ribosomal protein L12, mitochondrial	1	0
NM_139023.1	IOH12263	tetraspanin 32 (TSPAN32), transcript variant 1	3	3
ENST00000313613	IOH28285	olfactory receptor 5H6	2	0
NM_002413.3	IOH13576	microsomal glutathione S-transferase 2 (MGST2)	2	0
NM_003609.2	IOH4232	HIRA interacting protein 3 (HIRIP3)	1	2
BC034488.2	IOH22312	ATP-binding cassette, sub-family F (GCN20), member 1 (ABCF1)	2	3
NM_001086.1	IOH2181	Arylacetamide deacetylase	2	0
BC004932.1	IOH5521	chromosome 16 open reading frame 30 (C16orf30)	3	1
BC060804.1	IOH29226	ADAM metallopeptidase domain 12 (meltrin alpha) (ADAM12)	0	1
XM_378564.2	IOH42973	PREDICTED: Homo sapiens hypothetical LOC400500 (LOC400500)	2	3
BC103921.1	IOH63385	Protein Wnt-3a	0	1
BC010358.1	IOH14272	cytochrome P450, family 39, subfamily A, polypeptide 1 (CYP39A1)	1	2
NM_015170.1	IOH38422	Extracellular sulfatase Sulf-1	0	0
NM_021114.1	IOH56004	Serine protease inhibitor Kazal-type 2	2	3
P3040		CHK1 checkpoint homolog (S. pombe) (CHEK1)	0	1
PV3143		met proto-oncogene (hepatocyte growth factor receptor) (MET); see catalog number for detailed information on wild-type or point mutant status	0	2
BC007814.1	IOH6756	HLA class I histocompatibility antigen, Cw-7 alpha chain	0	1
BC030537.1	IOH21625	lipin 1 (LPIN1)	4	3
NM_001888.2	IOH56006	Mu-crystallin homolog	4	3
BC007637.1	IOH6973	chromosome 1 open reading frame 94 (C1orf94)	4	0
NM_032567.1	IOH21814	spermatogenic leucine zipper 1 (SPZ1)	3	2
CCP_10BSA		NA	0	2
BC045640.1	IOH25879	RAN binding protein 5 (RANBP5)	1	0
NM_031302.2	IOH13397	glycosyltransferase 8 domain containing 2 (GLT8D2)	3	2
NM_144582.1	IOH13625	Protein TEX261	0	1
NM_022465.2	IOH37941	IKAROS family zinc finger 4 (Eos) (IKZF4)	1	1
BC005408.1	IOH3257	Leucine-rich repeat serine/threonine-protein kinase 1	2	0
NM_024055.2	IOH3071	solute carrier family 30 (zinc transporter), member 5 (SLC30A5), transcript variant 2	1	0
BC008825.2	IOH6387	DEAH (Asp-Glu-Ala-His) box polypeptide 16 (DHX16)	0	1
NM_080820.3	IOH54776	D-tyrosyl-tRNA(Tyr) deacylase 1	1	0
BC092474.1	IOH62679	Proline-rich protein 16	2	0
BC042101.1	IOH26308	dual specificity phosphatase 16 (DUSP16)	2	5
BC092477.1	IOH62628	Serine/threonine-protein phosphatase 2A 56 kDa regulatory subunit epsilon isoform	2	5
BC000909.2	IOH11938	hypothetical protein FLJ22662 (FLJ22662)	1	4
BC067431.1	IOH62524	Cytochrome P450 2B6	2	5
NM_178226.1	IOH42134	F-box/WD repeat-containing protein 5	2	5
NM_173217.1	IOH59000	Beta-galactoside alpha-2,6-sialyltransferase 1	2	5
BC060825.1	IOH29162	Endothelial lipase	2	4
NM_032806.4	IOH29140	chromosome 3 open reading frame 39 (C3orf39)	3	5
NM_032459.1	IOH21413	embryonal Fyn-associated substrate (EFS), transcript variant 2	2	4
NM_005805.2	IOH40112	26S proteasome non-ATPase regulatory subunit 14	2	4
NM_001018062.1	IOH57354	UPF0544 protein C5orf45 [Source:UniProtKB/Swiss-Prot;Acc:Q6NTE8]	2	4
NM_152377.1	IOH11555	chromosome 1 open reading frame 87 (C1orf87)	1	7
BC031062.1	IOH27218	DEAD (Asp-Glu-Ala-Asp) box polypeptide 20 (DDX20)	4	6
BC054893.1	IOH29495	immunoglobulin lambda variable 2-14 (IGLV2-14)	3	3
NM_001001653.1	IOH45566	mediator of RNA polymerase II transcription, subunit 8 homolog (S. cerevisiae) (MED8), transcript variant 4	3	3
BC060841.1	IOH29167	integrator complex subunit 5 (INTS5)	1	2
NM_032284.1	IOH4769	Pre-mRNA-splicing factor 38A	4	7
NM_002254.5	IOH42589	kinesin family member 3C (KIF3C)	1	2
NM_005391.1	IOH10145	pyruvate dehydrogenase kinase, isozyme 3 (PDK3)	5	7
BC005187.1	IOH7207	ubiquitin-fold modifier conjugating enzyme 1 (UFC1)	2	2
BC008353.1	IOH6984	glycine-N-acyltransferase-like 1 (GLYATL1)	3	4
NM_012239.3	IOH3763	sirtuin (silent mating type information regulation 2 homolog) 3 (S. cerevisiae) (SIRT3), transcript variant 1	3	4
NM_012472.1	IOH26570	leucine rich repeat containing 6 (LRRC6)	4	5
BC004985.1	IOH6071	neurolysin (metallopeptidase M3 family) (NLN)	2	2
NM_144606.1	IOH12359	folliculin (FLCN), transcript variant 2	4	5
NM_024893.1	IOH22245	chromosome 20 open reading frame 39 (C20orf39)	4	5
NM_031311.2	IOH10663	carboxypeptidase, vitellogenic-like (CPVL), transcript variant 1	3	6
NM_017825.1	IOH12841	ADP-ribosylhydrolase like 2 (ADPRHL2)	4	3
NM_000784.2	IOH28889	cytochrome P450, family 27, subfamily A, polypeptide 1 (CYP27A1), nuclear gene encoding mitochondrial protein	3	1
NM_019070.1	IOH5264	DEAD (Asp-Glu-Ala-Asp) box polypeptide 49 (DDX49)	1	1
NM_005130.1	IOH3926	fibroblast growth factor binding protein 1 (FGFBP1)	2	2
NM_001136.2	IOH12890	advanced glycosylation end product-specific receptor (AGER), transcript variant 1	2	5
NM_145045.1	IOH13104	Coiled-coil domain-containing protein 151	2	1
NM_170713.1	IOH40971	Ras association (RalGDS/AF-6) domain family 1 (RASSF1), transcript variant C	2	1
NM_006202.1	IOH22369	phosphodiesterase 4A, cAMP-specific (phosphodiesterase E2 dunce homolog, Drosophila) (PDE4A)	1	5
BC007618.1	IOH6923	immunoglobin superfamily, member 21 (IGSF21)	1	1
BC000503.1	IOH3515	Rab9 effector protein with kelch motifs (RABEPK)	2	5
BC013955.2	IOH29308	Fibroblast growth factor receptor-like 1	3	6
BC007028.1	IOH7155	elastase 3A, pancreatic (ELA3A)	3	2
NM_004722.2	IOH14632	adaptor-related protein complex 4, mu 1 subunit (AP4M1)	1	1
NM_030577.1	IOH5575	transmembrane protein 177 (TMEM177), transcript variant 2	1	0
BC036059.1	IOH27271	plexin domain containing 1 (PLXDC1)	3	4
NM_032496.1	IOH6543	Rho GTPase activating protein 9 (ARHGAP9), transcript variant 1	5	3
NM_007041.1	IOH10743	Arginyl-tRNA--protein transferase 1	0	3
BC068547.1	IOH61662	Serine/threonine-protein kinase SRPK2	1	4
BC002707.1	IOH5356	spondin 2, extracellular matrix protein (SPON2)	2	0
NM_006748.1	IOH7132	Src-like-adaptor (SLA), transcript variant 3	4	5
BC094687.1	IOH62581	Elongation factor 1-alpha 1	2	5
NM_020426.1	IOH29483	lysozyme-like 6 (LYZL6)	3	2
BC063792.1	IOH40513	Uncharacterized protein KIAA1310	2	5
NM_024736.2	IOH7017	gasdermin domain containing 1 (GSDMDC1)	3	5
BC026058.1	IOH13488	stromal antigen 3-like (FLJ13195)	1	3
BC028199.1	IOH11414	CD300 molecule-like family member f (CD300LF)	3	0
BC036123.1	IOH27289	stromal membrane-associated protein 1 (SMAP1)	3	0
NM_177524.1	IOH45900	mesoderm specific transcript homolog (mouse) (MEST), transcript variant 2	3	1
NM_175072.1	IOH59828	Aprataxin	3	1
BC043277.2	IOH28731	synaptojanin 2 (SYNJ2)	5	1
NM_080816.1	IOH12104	signal-regulatory protein gamma (SIRPG), transcript variant 2	0	2
NM_183012.1	IOH53457	cAMP responsive element modulator (CREM), transcript variant 20, mRNA.	1	2
BC022532.1	IOH56003	Major prion protein	3	4
BC031606.1	IOH22809	peroxisomal biogenesis factor 7 (PEX7)	0	2
BC016961.1	IOH10330	dipeptidyl-peptidase 7 (DPP7)	2	3
BC025389.1	IOH11380	Proteasome subunit alpha type-7-like	3	3
NM_007227.3	IOH40151	G protein-coupled receptor 45 (GPR45)	0	0
NM_152295.3	IOH40824	threonyl-tRNA synthetase (TARS)	5	4
NM_005347.2	IOH14762	heat shock 70kDa protein 5 (glucose-regulated protein, 78kDa) (HSPA5)	4	0
NM_170672.1	IOH27295	RAS guanyl releasing protein 3 (calcium and DAG-regulated) (RASGRP3)	3	0
BC014299.2	IOH12128	Uncharacterized protein C14orf93	5	1
BC003164.1	IOH46140	leukocyte receptor cluster (LRC) member 4 (LENG4)	3	3
NM_000318.1	IOH7247	peroxisomal membrane protein 3, 35kDa (Zellweger syndrome) (PXMP3), transcript variant 1	2	2
NM_020163.1	IOH42833	Semaphorin-3G	0	0
NM_032141.1	IOH43707	coiled-coil domain containing 55 (CCDC55), transcript variant 1	3	3
NM_174940.1	IOH3344	transmembrane protein 80 (TMEM80), transcript variant 1	2	2
BC016442.1	IOH28612	Fibronectin type III and SPRY domain-containing protein 1	5	3
BC042174.1	IOH28018	keratin 4 (KRT4)	0	1
BC100863.2	IOH63510	Neuritin-like protein	1	0
BC053898.1	IOH29029	homeobox C8 (HOXC8)	0	1
NM_000245.1		Hepatocyte growth factor receptor	0	1
BC057780.1	IOH29273	solute carrier family 5 (sodium/glucose cotransporter), member 11, mRNA (cDNA clone MGC:71585 IMAGE:5287366), complete cds	1	0
PV5216		sphingosine kinase 2 (SPHK2)	0	1
BC059364.1	IOH29285	zinc binding alcohol dehydrogenase, domain containing 1 (ZADH1)	3	0
BC053347.1	IOH28937	myelin associated glycoprotein (MAG)	1	0
BC020898.1	IOH13022	transmembrane protein 182 (TMEM182)	3	2
BC017799.1	IOH14286	nucleoporin 62kDa C-terminal like (NUP62CL)	2	0
BC010167.2	IOH13169	chromosome 14 open reading frame 172 (C14orf172)	3	1
BC003154.1	IOH5098	tripartite motif-containing 32 (TRIM32)	2	1
BC014457.1	IOH12101	glycine C-acetyltransferase (2-amino-3-ketobutyrate coenzyme A ligase) (GCAT)	1	0
BC001214.1	IOH4802	leucine carboxyl methyltransferase 1 (LCMT1)	1	0
NM_003794.1	IOH14878	sorting nexin 4 (SNX4)	2	0
NM_001157.2	IOH6821	annexin A11 (ANXA11), transcript variant a	1	0
NM_021101.3	IOH10602	claudin 1 (CLDN1)	2	0
BC017269.2	IOH29346	chromosome 10 open reading frame 47 (C10orf47)	2	6
BC032309.1	IOH27536	arylacetamide deacetylase (esterase) (AADAC)	3	5
NM_173623.1	IOH27653	tubulin tyrosine ligase-like family, member 6 (TTLL6)	2	5
BC052802.1	IOH29404	KIAA0467 (KIAA0467)	4	5
BC064939.1	IOH40487	vezatin, adherens junctions transmembrane protein (VEZT)	3	4
BC005249.1	IOH7355	estrogen receptor binding site associated, antigen, 9 (EBAG9)	2	4
BC005876.1	IOH6081	V-type proton ATPase 21 kDa proteolipid subunit	3	4
NM_000345.2	IOH14008	synuclein, alpha (non A4 component of amyloid precursor) (SNCA), transcript variant NACP140	4	5
NM_012430.2	IOH3204	Vesicle-trafficking protein SEC22a	4	5
BC020646.1	IOH14210	CD302 molecule (CD302)	3	3
PV4128		epidermal growth factor receptor (erythroblastic leukemia viral (v-erb-b) oncogene homolog, avian) (EGFR); see catalog number for detailed information on wild-type or point mutant status	5	5
NM_000166.2	IOH5432	gap junction protein, beta 1, 32kDa (GJB1), transcript variant 2	4	3
BC093743.1	IOH61985	bone morphogenetic protein 8a, mRNA (cDNA clone IMAGE:7939588), complete cds.	4	3
BC010896.1	IOH14253	chromosome 3 open reading frame 28 (C3orf28)	4	4
BC022045.1	IOH14841	mitochondrial ribosomal protein S31 (MRPS31)	4	2
PV4875		Inhibitor of nuclear factor kappa-B kinase subunit epsilon	3	7
[truncated: 7,484 more rows]
